# Supplementary material for: Comparative genomic analysis of the IDD genes in five Rosaceae species and expression analysis in Chinese white pear (Pyrus bretschneideri)
Source: PeerJ. 2019 Mar 26;7:e6628. doi: 10.7717/peerj.6628 (PMC6440465; doi:10.7717/peerj.6628)
Supplement: Supplemental Information 12 [file peerj-07-6628-s012.xlsx]

## Sheet: Table S1
Supplementary Table S1. Gene sequence involved in the article
Gene name	Acession number	Protein sequences
PbIDD1	Pbr029706.1	MPTDLDNSSTASDPDAEVIALSPKTLMATNRFVCEICSKGFQRDQNLQLHRRGHNLPWKLRQRSSKEVKKRVYVCPEVSCVHHDPSRALGDLTGIKKHFCRKHGEKKWKCDKCSKKYAVQSDWKAHSKICGTREYKCDCGTLFSRRDSFITHRAFCDALAEESAKAHTPTAAAAATAVNLNSESDPKTQSANSPPQAPPPPPPQAAAPSQPTTSSVPSMSAGVLSSSLPTQSTVRELPENPTQVVEEVQVVVGRKGNCSSSSSSNGSTSSGVFASLFTSSTTSASLQPPQQPAFTDLIRAMGHPDQSNDLAPSSSMEPISLGLSTSHGSSIFESAGHERRQYAPPPQPAMSATALLQKAAQMGPAETNASLLRGFGIMSSASSSVQQETMQWNQRPAEP…
PbIDD2	Pbr006167.1	MGELDNSSSPLPKVSTASGGEASLTSSAREAMTRSEPPQKKKRNLPGMPDPEADVITLSPTTLLATNRFVCEICSKGFQRDQNLQLHRRGHNLPWKLKQRTSKEVRKRVYVCPETSCVHHNPTRALGDLTGIKKHFCRKHGEKKWQCERCSKKYAVQSDWKAHMKTCGTREYKCDCGTLFSRRDSFITHRAFCDALAEESAKAQTLMVGSGGSTNPSSNPAPSAKSAVVASPPPPPHTPSNTVVSPALSIQSSELPENPIGLSPPAPATTCLTTTAISTTSIATTSTGNCNNGTSVFASVFAPSSASALMTQPPQASSPSSFTNQVSTLGRLDGSTTTSAINEPTSLSLSTSLYLSSTGFSLFPTPDQQDHRDYAQPAAMSATALLQKAAQMGAAASNA…
PbIDD3	Pbr032492.1	MMLFQQQYSQQLVDENMSNLTSASGEAASVSSGNRNEIGTNFSQQFFTTPPQAQPALKKKRNLPGNPDPDAEVIALSPKTLMATNRFICEICNKGFQRDQNLQLHRRGHNLPWKLKQRTSKEVRKKVYVCPEASCVHHDPSRALGDLTGIKKHFCRKHGEKKWKCDKCSKRYAVQSDWKAHSKTCGTREYRCDCGTLFSRRDSFITHRAFCDALAEESARAITSANNPHHLLISQQQQQMNLNQVQLGHQFNQDIHGFSLKKEQQSFTTLRPDLPPWLGPPNCTIDLSSSSSLFSPTHHQDLSLDDSHNGTSQNPNPSPSSLGPTLPPFHPAPSPHMSATALLQKAAQMGATMSSKHSTTTAAAAASASPQPMVRVHQHSQGHMSEFSGHVSAFAAAGA…
PbIDD4	Pbr021137.1	MQMMSGDGFSINMSSAIDGFAQDHQLNDNPSGGLKPNPPNAVAKKKRNLPGTPGKQYESWWVCSQFIVSYFVSTDPDAEVIALSPTTLMATNRFVCEICNKGFQRDQNLQLHRRGHNLPWKLKQRLNKEVKKKVYICPEKTCVHHDPSRALGDLTGIKKHFSRKHGEKKWKCEKCSKKYAVQSDWKAHSKTCGTREYKCDCGTLFSRKDSFITHRAFCDALTEESARLTTSSVIGVHSNLNFGNDAMLNNPMMNNSQAVVQDVSQISMQYGQGLMRQDFNGLDQLHQHEKPRLSLWLNQQATSNSNQVNLMDDMQANPNHPLYVTSSSSNAFPEMVQMPSSSNNVNLFGSSNSMTTFRASTSGANLSLSPGQESGTSKLIGKNGNLVGSGTSKPPAAPM…
PbIDD5	Pbr028264.1	MMLFHQQQSQRLVDENISNLTSASGEAASALSGNKNEIGTRFSQQFFTTPPQAQPTLKKKRNLPGNPDPDAEVIALSPKTLMATNRFICEICNKGFQRDQNLQLHRRGHNLPWKLKQRTSKEVRKKVYVCPEASCVHHDPSRALGDLTGIKKHFCRKHGEKKWKCDKCSKRYAVQSDWKAHSKTCGTREYRCDCGTLFSRRDSFITHRAFCDALAEESARAITSANHPHHLLISQQQPQMNLNQVQLGHQFNQDIHGFSLKKEQQSFTTLRPDLPPWLGPPNCTIDLSSSSSLFSPTHHQDLSLHDSHNDTSQNPNPSSLPPFQPAPSPHISATALLQKAAQMGATMSSKNSTTAATTSEAAATSASPQPMVRAHQHNPGHVSDFAAAGANAIPGTTGP…
PbIDD6	Pbr019853.1	MMNKGLMLDENMSNLTCASGDLSASNSSIRNESSSAGTVYPHPPSAAQIQQQQAPPPPKKKRNLPGNPDPDAEVIALSPKSLMATNRFVCEICNKGFQREQNLQLHRRGHNLPWKLKQRTGKEVRKKVYLCPEPTCVHHDPSRALGDLTGIKKHFSRKHGEKKWKCEKCSKRYAVQSDWKAHSKVCGTREYRCDCGTLFSRRDSFITHRAFCDALAQENNTSSAAARSVMPASINPLLSSLPQLHSHGLQAQSAVKREQDQHQQQLLPPWLSFLPEGGEAASLPTMNLSASPLFSTSSFQQYYSFGQNPNPSSSSTALLPDNFQLQQNTASPHMSATALLQKASEMGATISKSSPSPYLLKPPTHQSHQAHQAHISNETSRDQAILLDDGFGNNESKSS…
PbIDD7	Pbr012193.2	MLPPQPQAQPHHLRRKGEINLEIQANPDAEVIALSPKTLMATNRFICEVCNKGFQREQNLQLHRRGHNLPWKLKQKTNKEPRRKVYLCPEPSCVHHDPSRALGDLTGIKKHYSRKHGEKKWKCDKCSKRYAVQSDWKAHSKTCGTREYRCDCGTLFSRRDSFITHRAFCDALAQESARHPSSLSTMGGNLYGNNHMSLGLPQIPSLQNSTHLPNNMLRLGSGGSAKFEHLIPPSNPSSFGSQAMPNSPNFFMRDIANQQGFQDQHQFPSKALHGLMQLPDLQSNPNNNSPSSNSAANLFNLSFFSNNSTSNSIAPPDHQFSDGNGSGQGFSMGNDHQIGSGSVPSLYGNSMQHEGGVAPHMSATALLQKAAQMGSTTSTESSSLLRGLGNSSTRAAKSG…
PbIDD8	Pbr020403.1	MSIITGSAATGSFSSGNTGGEEVQQQQQELLNHHANFHGSNSFLPTTPNINSNGISTTQVQKQPPPAKKKRNLPGTPDPTAEVIALSPKTLMATNRFVCEICKKGFQRDQNLQLHRRGHNLPWKLKQRTSTEIIKRVYICPESSCVHHDPLRALGDLTGIKKHFFRKHGEKTWKCDKCSKKYAVQSDWKAHQKTCGTREYRCDCGTIFSRRDSFITHRAFCDAIAEENNRNQGVVPMSNNIMGAPNQGQLSNSELVIPASPPMNNKITDNPSSARSDTTTSDQFHHNFDAKNAPLTLEPQLPFPMPTKPVNMLPRTLNNNTSSSTSSSSLLFGLNHSGHGQSLIPNSSGHLSATQLLQKAAQMGATMSGGPKPNPSGTTITSMAPSTYGTATGGYNMNP…
PbIDD9	Pbr009954.1	MFPISMSNSTSLSEEANSVSSDFAAALNPLLLSTNISSHQSDQPPNKIKKKRSLPGNPDPDAEVIALSPKTLLATNRFVCEICNKGFQRDQNLQLHRRGHNLPWKLKQRNSKDQIRKRAYVCPEPSCVHHHPSRALGDLTGIKKHFCRKHGEKKWKCDKCSKIYAVQSDWKAHSKTCGTREYRCDCGTLFSRKDSFITHRAFCDALAEESARLSANQFATATTTTAAITPQISLFPFPTHQQQHFTNPNTPLPPFTTISLTPWDLPQSHQNPNTNPTQNSPLHHLIKPESHRHFPPRPPQPQQPHNGLITSPFQGLHVSTQPNSNPSTSSAHLSATALLQKAAAVGAAAAQQGQSAGLAVGEFGTASHMISTEYLGGFTSGDVSTWRKTDSLTRDFLGL…
PbIDD10	Pbr012907.1	MFPISMSNSTSLSEEGNSVSSDFAAALNPLLLSTNISPHQYDQPPNKIKKKRSLPGNPDPDAEVIALSPKTLLATNRFVCEICNKGFQRDQNLQLHRRGHNLPWKLKQRNSQDQIRKRAYVCPEPSCVHHHPSRALGDLTGIKKHFCRKHGEKKWKCDKCSKIYAVQSDWKAHSKTCGTREYRCDCGTLFSRKDSFITHRAFCDALAEESARLSANQFATAAITTATITPQISLFPFPTHGQQHFTNPNPPLPPFTTISLTQWDPPQPHQNPNPSPNPTQNSPLHHLIKPESHHHFPPPPQQLYKGLIISPFQNLHVSTQPNSNPTTSSTHLSATALLQKAATVGAAVASGAQQGQSAGLTVGEFGTASHMISTEYLGGFGSGELATWRKTDSLTRDFL…
PbIDD11	Pbr008330.1	MAKNRFVCEICNKGFQRDQNLQLHRRGHNLPWKLKQRLNKEVKKKVYICPEKTCVHHDPSRALGDLTGIKKHFSRKHGEKKWKCEKCSKKYAVQSDWKAHSKTCGTREYKCDCGTLFSRKDSFITHRAFCDALTEESARLATSSVAGAPTNLNFGNDAMLNNPMMNNSQAVVQDGSQISMQYEQGLMRQDFNGLDQLHQHEKSRLSLWLNQQANSNSNQINLMDEMQANPNHPLYLTSSSSNTFPEMVQMPSSSNNVNLFGSSDSMSTFGASTSGANLSLSPVQESGTKKLIGNNSNLVGSNVSKPPAAPMSATALLQKAAQLGSTRSSNNQGSSLGVNVMSSSSFSNTLMGFSNLNQDRSNELHQFVQNAHQSRGGSANLSSLTSSSSHTSSTTLEQL…
PbIDD12	Pbr012192.1	MAASSSSGAPLFGIREEDQNQQMNKQQHSSATPTSSTAAPAAPTQKKRRNQPGTPSKTDPEAEVIALSPKTLMATNRFICEVCNKGFQREQNLQLHRRGHNLPWKLKQKTTKEPKRKVYLCPEPTCVHHDPSRALGDLTGIKKHYSRKHGEKKWKCEKCSKRYAVQSDWKAHSKTCGTREYRCDCGTLFSRRDSFITHRAFCDALAQESARHPPSLSTIGSSLYGGGSLSNTGLGLSHQVVGPPHQLSSLDHNNQSSLLRLGGSSGADAAARTGQFDHLLSSPSMGSSFRSAQSSAASFFMTGASDHDQSNQQQYHDQDKSFHGLMQFQSPHQHHSGGGANIFNLPFLSNSTTNNTNSYSANNNNLLISPDHFNTNPNGSTTGGGSDVSNNLFTGHIMG…
PbIDD13	Pbr025606.1	MSPKSLMATNRFVCEICNKGFQRDQNLQLHRRGHNLPWKLKQRSKTEVIRKKVYVCPEKSCVHHEPSRALGDLTGIKKHFSRKHGEKKWKCEKCSKKYAVQSDWKAHSKVCGTREYRCDCGTLFSRKDSFITHRAFCDALAAEQSARFCSAPTTSNINPSFMNGSIANNTHKPQRIPHFIPMFQPEFAGSDHLAANNHLSSNAFIPEMLQTASMDMFGSSSSSQMQWLINNNKFVEESSFANANNLSMSSPSLLRGVLKEDEESKGSFSETISTTTSTSFYNNNNNKQNHHHHHQPMSATALLQKAARMGSTTSNNNNPATTFNDTTLNFNDLVNSMSSSSTQGATIEDGSLFLSNKHLMMPAGAAAMTRQGTSEQSSLTRDFLGVGGGDAIFGGGVPF…
PbIDD14	Pbr029012.1	MSPKSLMATNRFVCEICNKGFQRDQNLQLHRRGHNLPWKLKQRSKTEVIRKKVYVCPEKTCVHHEPSRALGDLTGIKKHFSRKHGEKKWKCEKCSKKYAVQSDWKAHSKVCGTREYRCDCGTLFSRKDSFITHRAFCDALAAEQSARFCSDSTIHPSFMNGSFTNNAHQPQRIPNFIPMFQSEFAGSDHLAANNSHLSSKAFMPEMLQTASMDMFGSSSSSSQMQWLINNKKFVEESSFANANNLSMSSALLLRGVLKEEEQSKGSFSETITTTTTSFYNNNINNNQNHHQQKPMSATALLQKEARMASTTSNKNPVTAFNDAAFNFNDLVNFMSPSSTQGATVGDGSLFLSNKHSMMSAEAAAMTKQGQSEQSSLTRDFL
PbIDD15	Pbr038802.1	MLPNNSSSLVPSSDPFSCLENGNTNKRKRRPAGTPDPDAEVVSLSPKTLLESDRYICEICNQGFQRDQNLQMHRRRHKVPWKLLKRETPVVKKRVFVCPEPSCLHHDPCHALGDLVGIKKHFRRKHSNHKQWVCDKCSKGYAVQSDYKAHLKTCGTRGHSCDCGRVFSRVESFIEHQDACNMDRVRPESQTLQPAACLSRTASSPSPSCSDNNFSRAPSTWPPSNNLALPHPSPTEYTKLILRNPPDHADHHQATLSKKNSSNAHYNLDLQLATTSNINIPINEVSVSSKREENHSTQLQLSIGSCEFGGGDRSHQNKTIEQHSNIMIANRNYSSRGNEVKERERESSSTTTNHHEHDDDGQKPKPATVAAGILRLKEEAREQLRLAMAEKDYSEEARQ…
PbIDD16	Pbr012170.1	MFDNTTTTNNNTAASCSAPPSSSSHENGGATHKRKRRPAGTPDPDAEVVSLSPKTLLESDRYVCEICNQGFQRDQNLQMHRRRHKVPWKLLKREIAEDQVIKKKVFVCPEPSCLHHDPRHALGDLVGIKKHFRRKHSNHKQWVCDKCSKGYAMQSDYKAHLKTCGTRGHSCDCGRVFSRVESFIEHQDTCTVRHVVRPELQTALQPAACSSRTASSTSPSSDANFSFSNNVAAPLVMAGLPVRPNPTHHHDKRAGMNPYISCNRQQQQQQQHQQQHQQEVHNNILELQLLPSSNAHTSSPPNLDESHATNLKLSIGSPSSDQLANEKNESSKYNSSSDIKRRRSSPGNEKNINNASAVGGVGSTSELVRLKEFASEELKLAVAEKSYAEDARREAKRQI…
FvIDD1	FvH4_1g13710.1	MPTDLDNSSTASGEASVSSSGNQTAPAPKPITKKKRNLPGMPDPDAEVIALSPKTLMATNRFVCEICNKGFQRDQNLQLHRRGHNLPWKLRQRSSKEVKKRVYVCPEVSCVHHDPSRALGDLTGIKKHFCRKHGEKKWKCDKCSKKYAVQSDWKAHSKICGTREYKCDCGTLFSRRDSFITHRAFCDALAEESARGPSQTQNVKSNSESDPKVQRANSPPPPPPAQASVPSQPSSSSAPSQPPILPIQSSVPVPELPENPPEDAPVVTQRKGHCSSSNSSSSNGSTSSSVFASLFASSTTSGASLQPPQPPAFTDLIRAMGQPDLPTDLAPSASIEPISLGLSTSHASSIFGTAGQERRQYAPPPQPAMSATALLQKAAQMSATSNASLLRGFGIVSSS…
FvIDD2	FvH4_2g40030.1	MDDLDNSSSLVDSTASAEASFSEPPAKKKRNLPGMPDPDAEVIALSPKTLMATNRFVCEICNKGFQRDQNLQLHRRGHNLPWKLRQRTTTEVKKRVYVCPETSCVHHNPARALGDLTGIKKHFCRKHGEKKWKCERCSKKYAVQSDWKAHMKTCGTREYKCDCGTLFARRDSFITHRAFCDALAEESAKAQTLGSSQLGTPNPNPNAGKAVLVASPPPPPLTPSNIVVSPALSIQSSEFPAENPVRVSPPPPATTCLTSATTAIGTTATATTTSTGNCSNTSTSVFASIFAPSSNASQTSAAANSSYSSAIPSVSAMEPTSLSLSTSLYLSNNGSSLFPTTNHQDQRQYVASPQAPVMSATALLQKAAQMGAATTSESFLRGFGLDTSSSPPQAQDSTA…
FvIDD3	FvH4_6g33550.1	MKALQFQQQQQVDENMSNLTSASGDQASVSSGNRSTEIGTSNFSQQYFPPPPPQANSQGVKRKRNQPGNPDPDAEVIALSPKTLMATNRFICEICNKGFQRDQNLQLHRRGHNLPWKLKQRTSKEVKKKVYVCPEASCVHHDPSRALGDLTGIKKHFFRKHGEKKWKCDKCSKKYAVQSDWKAHSKTCGTREYRCDCGTLFSRRDSFITHRAFCDALAEESARATNPTPLQTLSSPPPPSHQSQINLMGGGGGPHLNFNPHGHDLHAYSAFMKKEHNNDHDQQIGSFSSTSSLLPPWLASGPPPTAPSIFSGNQDHHHDFQQNLELGPNPNPSLGPTLPQFQVPAAAAALSSPPHMSATALLQKAAQMGATMSSSSSTSGSLSVPAGIMTRSHQGGHVS…
FvIDD4	FvH4_6g15680.1	MMSGDGYSLMPSAIEGFDHQLNPANPSQNQKSNPAVKKKRNLPGTPDPDAEVIALSPTTLMATNRFICEICNKGFQRDQNLQLHRRGHNLPWKLRQRTNKDVIKKKVYICPEKTCVHHDPSRALGDLTGIKKHFSRKHGEKKWKCEKCSKKYAVQSDWKAHSKTCGTREYKCDCGTLFSRKDSFITHRAFCDALTEESARLTSAAAAATNLNFGNDPSANNTMMNSQAVQDVSQISDFEKPSRLSFWMNQQPNNLNVIDMAAANSNNLYDMVQMGSATSLFGSNSMSNFGASTSISSANLSLSSPMGLKDQEGRNIKPNIISKPPSAPMSATALLQKAAQLGSTRSSNQSLPGSSAGVMTSPPSSNTLNFNRGSNELNQLFQPRNTTSSNLVSSLSCAS…
FvIDD5	FvH4_6g06270.1	MSTITGSGVGSFSSGNTTSADEVLQQQQQELLNHFHGSDSLQEITVNGTSATQQQQPPPAKKKRNLPGTPDPSAEVIALSPKTLMATNRFVCEICKKGFQRDQNLQLHRRGHNLPWKLKQRSSTEIRKRVYVCPEPSCVHHEPSRALGDLTGIKKHFCRKHGEKKWKCDKCSKKYAVQSDWKAHSKTCGTREYKCDCGTVFSRRDSFITHRAFCDAIAEENKTSVQGQGVVLMSNNLGQQNLQQGGQLVSGGELMIPASVPMSNTETATANPSTSSKTSNHFDHFDTKNPNLTLVPQGVPSNMLLSSPRSGLHNNSLSSSTSSALFHNHLGHQVLLPSSISGHLSATELLLKASQMGATMSSNYNSSGMSMAPSTYGDFSRYVNNQFMQQKNGNNIPVQ…
FvIDD6	FvH4_4g36050.1	MAAASSSLAFFGNNSRDENQNQLMTSLQQPPPASSTAPISTTPPTAPPPKKRRNQPGNPNPDAEVIALSPKTLMATNRFICEVCNKGFQREQNLQLHRRGHNLPWKLKQKTNKEPKRKVYLCPEPTCVHHDPSRALGDLTGIKKHFSRKHGEKKWKCEKCSKRYAVQSDWKAHSKTCGTREYRCDCGTLFSRRDSFITHRAFCDALAQESARHPSSLSAIATSSHLYPGNNQMMSLGLSQMGGGSSLPPNNMLRLGTTGAGGAAKFEHFMNPSSFGQAQPMPNSSASFFNQGFQDQQQSLNGSFAANKSLHGLMQLPDLQSNTPSNNSPSSTTTAAGSLFNLGFFSNNNSDHHQFSDGNGGSQGTTLFPNGMTDHIGSALPSSLFGNSLQHENMTGAHM…
FvIDD7	FvH4_2g31720.1	MQPPNYQQGANPLIMMKGFAVDENMSNLTCASGDLSASANSSIRNDSSSSTHQQQPAQKKKRNLPGNPDPDAEVIALSPKSLMATNRFICEVCNKGFQREQNLQLHRRGHNLPWKLKQRTNKEVKKKVYLCPEPTCVHHDPSRALGDLTGIKKHFSRKHGEKKWKCEKCSKRYAVQSDWKAHSKICGTREYRCDCGTLFSRRDSFITHRAFCDALAQENSNAARAINPLLSSSSLPQLHGGFQPHHHLSHHHVKREVQDLQLQLPPWMGGEAATSAGPSHHLSSNINLSSSSPLFSTSSFDQHQSFLHQNPNPSSSDFQPSGASAHMSATALLQKASEMGATVSKPSSMFLKPHDQQQQHQASHMMPETTAFSSFMEGNSGGPTNNSLLHDMMMMTSHM…
FvIDD8	FvH4_3g32700.1	MMSSEDGLSVPSTIGGGFLLQESNPSPNPNPNTINPALKRKRNLPGTPGKYIAYPDAEVIALSPKSLMATNRFLCEICNKGFQRDQNLQLHRRGHNLPWKLKQRSKLEVIRKKVYVCPEKSCVHHEPSRALGDLTGIKKHFSRKHGEKKWKCEKCSKKYAVQSDWKAHSKICGTREYRCDCGTLFSRKDSFITHRAFCDALAAEESARFGSTSTATNINIPSFMNGSITSNQPHHHQQQQQARNIPQFLPIFQHQQQPEFPGSDHLSAANLGLSEMVQPASSSMDMFGPSSSQNQWLNKFPEASFTNGNLSVSSLMTRGLKEEEDSKANLNLSGTMSSGSFYNNNQSPGHMSATALLQKAAQMGSTTSNNNDVDIPAAFGFMNSSPYSHNKNNENFNVL…
FvIDD9	FvH4_2g22950.1	MFPSVAAMSNSTSLSTEEAASVSSGSRLPDHFACLNPLSVSPLDHQQPPQKIKKKRSLPGNPDPDAEVIALSPKTLLATNRFVCEICNKGFQRDQNLQLHRRGHNLPWKLKQRSSKDLVKKRAYVCPEPSCVHHHPSRALGDLTGIKKHFCRKHGEKKWKCDKCSKIYAVQSDWKAHSKTCGTREYRCDCGTLFSRKDSFITHRAFCDALAEESARISASQLAIATTPQTSLFPFLNPPHFTNPPSLPFTTLSPWDPTQNPNPNTTQNPLHHHIKPEQTYHHFPLNPTLFQDTPSPQHKPQLMTSPFQNLHVSTQPNSSVAMSATALLQKAATIGASAAGQQQSHSSGLAEFGTLGGFTSGDLVTWQKTDRLTRDFLGLTSADGNDCNHGNGAVNVVKD…
FvIDD10	FvH4_c6g00070.1	MITDPSAEVIALSPTTLMATNRFVCEICNKGFQRDQNLQLHRRGHNLPWKLRQRTSTEVRKRVYICPEPTCVHHNPARALGDLTGIKKHFSRKHGEKKWKCDKCSKKYAVQSDWKAHQKTCGTREYKCDCGTIFSRRDSFITHRAFCDALAEENNKVNHGLIMNNNMGTHNQMPDHLISSMPMNTNTSMGIGAGAISEYNNYDPKNPLKSLPDELVPMPFKSIMNTNLPAGGGMFSTSSGSLFGGSRSVNNNSSTSSSLQLSSNNSSSAGFNYLQDSKNGCGGSPNVTGSAQMSATALLQKAAQMGATASNTTINSPMMQKSFVSSMAGPENHHHLSNNSINVTRPPYDHHPQFQQVQQQQLPDHHQMAGMHGFTNQLFGEANSTSAASSAAMSDHMAG…
FvIDD11	FvH4_4g36040.1	MITDPSAEVIALSPTTLMATNRFVCEICNKGFQRDQNLQLHRRGHNLPWKLRQRTSTEVRKRVYICPEPTCVHHNPARALGDLTGIKKHFSRKHGEKKWKCDKCSKKYAVQSDWKAHQKTCGTREYKCDCGTIFSRRDSFITHRAFCDALAEENNKVNHGLIMNNNMGTHNQMPDHLISSMPMNTNTSMGIGAGAISEYNNYDPKNPLKSLPDELVPMPFKSIMNTNLPAGGGMFSTSSGSLFGGSRSVNNNSSTSSSLQLSSNNSSSAGFNYLQDSKNGCGGSPNVTGSAQMSATALLQKAAQMGATASNTTINSPMMQKSFVSSMAGPENHHHLSNNSINVTRPPYDHHPQFQQVQQQQLPDHHQMAGMHGFTNQLFGEANSTSAASSAAMSDHMAG…
FvIDD12	FvH4_6g26760.1	MATNRFLCEICGKGFQRDQNLQLHRRGHNLPWKLKQRTSKEPRKRVYVCPEKTCVHHHASRALGDLTGIKKHFCRKHGEKKWKCEKCSKRYAVQSDWKAHSKTCGTREYKCDCGTLFSRRDSFITHRAFCDALAEETARVNAVSNIHNNAMPSNINYHHYMGNNASSLLLGPPNMSQLQFSSIFKPISSNDTPDAMSQTSRSLSLWMGQGSNGTHEEMTANNHHHQHQLGSVSSSAGSIFGDPNNISVSCSEPPPPSDHYQLNWVLGSNNKLSPSNNAHHQDQLTITSMSSAANSLPSMYTHQMPSANMSATALLQKAAQIGATSTDKTSLLGSFGLKSNNNNSTSSASHQAVTQVQDGSKVCGLYGTAEDQGAHDHHLLQHMHQAKRRHIQSEEGAGG…
FvIDD13	FvH4_5g17840.1	MLANNSSPSVPCSEPFSCLENGNSNKRKRRPAGTPDPDAEVVSLSPKTLLESDRYVCEICNQGFQRDQNLQMHRRRHKVPWKLLKRETPVVRKRVFVCPEPSCLHHDPCHALGDLVGIKKHFRRKHSNHKQWVCEKCSKGYAVQSDYKAHLKTCGTRGHSCDCGRVFSRVESFIEHQDACNMDRLRSESQAVVLQTPACLSRTASSPSPSSETNFSSRTTTPNWPSASALMVPKPVHDNTKLILSSPPAGHGIGDRNRNSSKNVNANSLYNLDLQLATTSNASNPSHIEVSVSSPSKRDVENHSTQLQLSIGSCDNFGDHHHHQKNINIESNRNSPRESSTSTNEHHHQQMILPAGESSTTSRIIKEEAREQLRLAMAEKAYAEEARQQAEQQIELAEQ…
FvIDD14	FvH4_4g35830.1	MLANNNHTNTTTASSAAPSSSSDHHHHVFPPLENGVPPPPTTHKRKRRPAGTPDPDAEVVSLSPKTLLESDRYVCEICNQGFQRDQNLQMHRRRHKVPWKLLKREIQDQVKKRVFVCPEPSCLHHDPCHALGDLVGIKKHFRRKHSNHKQWVCDKCSKGYAVQSDYKAHLKTCGTRGHSCDCGRVFSRVESFIEHQDTCSVRHVVRPELQALQPATACSSRTASSTSPSSDGHFSINNNNAPHPMPGLTVMPKPNEQPVVFIRSHEGHDGNPSPSNRHQQQQPQEHEQEHMLELKLLPSSDAQTSPRNEEENYATRLKLSIGGSSHSGDQNNESPRCSSREMNTNIGIGGGASWEVARLKDIASEELKLAMSEKAYAEEARREAKRQIEMAEVEFANAK…
PmIDD1	pm__Pm026593	MPTDLDNSSTASGEASVSSSGNQPMPPKPTTKLKKKIPQIYPDAEVIALSPKTLLATNRFVCEICNKGFQRDQNLQLHRRGHNLPWKLRQRSSKEVKKRVYVCPEPSCVHHDPSRALGDLTGIKKHFCRKHGEKKWKCDKCSKKYAVQSDWKAHSKICGTREYKCDCGTLFSRRDSFITHRAFCDALAEESARGHTQTPTQTQTEVNLNSESDPKAQSANSPPQPTPQPPVPSQATTSSVPSQSAGLLSSPMPSTQNPVTELAENPTQTMEEAPMVTGPKGNCSSSNSSSSNGSTSSSVFASLFASSTASASLQPLQPPMFTDLVQVMGNPDSTTDLAPSSSVEPISLGLSTSHGSSLFGPMGQERRQYAPPPQPMMSATALLQKAAQMGAAATNASLL…
PmIDD2	pm__Pm005795	MGDLDNSSSPLLTVSTASGEASLSSSAHETMTLPEPPLKKKRNLPGMPDPEAEVIALSPTTLLATNRFVCEICNKGFQRDQNLQLHRRGHNLPWKLRQRTTKEVRKRVYVCPETSCVHHNPTRALGDLTGIKKHFCRKHGEKKWKCERCSKKYAVQSDWKAHMKTCGTREYRCDCGTLFSRRDSFITHRAFCDALAEESAKAQTLAIDGSDGNQNLNNHSPNPNAKGVVASPPPPPLTPSNTVVSPMLSIQSSGNCNNGSSVFASIFAPSTASALISQPPQTSSPSSFSNQVSTLGRPDGSTTIPTVSSINEPTSLSLSTSLYLSSNGSSLFPTPEPQDHRHYAQPMVMSATALLQKAAQMGAAASNASLLRGFGLATSSSSPSQENSTALQWNKPESG…
PmIDD3	pm__Pm013340	MMKGLMFQQQQQQQHSQLVDENMSNLTSASGEAASVSSGNRNEIGTSFSQQFFAPPPSQTQPMLKKKRNLPGNPDPEAEVIALSPKTLMATNRFICEICNKGFQRDQNLQLHRRGHNLPWKLKQRTSKEVRKKVYVCPEASCVHHDPSRALGDLTGIKKHFCRKHGEKKWKCDKCSKRYAVQSDWKAHSKTCGTREYRCDCGTLFSRRDSFITHRAFCDALAEESARAITTGNNNPLLISPQQQQLQQPGSTSASHHHHMNLNQVQLAHQFQDLHGFSLKKEQQSFTSLRPDLPPWLACPGPPNNTSIDLSSSSSIFSTRLDQNFTQTHQNLSLHDHDSTAPNPNPNPNPSLGPTLPPFQPMPSPHMSATALLQKAAQMGATMSSKNSTASAAAATSAG…
PmIDD4	pm__Pm005951	MAAASSSIPFFGSTGSREETQGQMTSTLQQHSSATPSSNTTAAAAAPPPQKKRRNQPGNPNPDAEVIALSPKTLMATNRFICEVCNKGFQREQNLQLHRRGHNLPWKLKQKTTKEPRRKVYLCPEPTCVHHDPSRALGDLTGIKKHFSRKHGEKKWKCEKCSKRYAVQSDWKAHSKTCGTREYRCDCGTLFSRRDSFITHRAFCDALAQESARHPSSLNTMGGQLYGNNHMSLGLSQIPSLQNQTHLPNNMLRLGNAGGAKYEHLITPSNPSSFGSQAMPNSSNFFMRDIANQQGFQDQHQFPSKAALHGLMQLPDLHSNGNNNNSPSSTSAANLFNLSFFSNNSTSSSLTPPDHQFSDGNGGGQGFSMGAADHHNMGSATLPSLYGNSMQHESNIASH…
PmIDD5	pm__Pm030100	MQMMSGDGFSIIPSAIDGFAQEHQLNANPSSQKPNPNNPVAKKKRNLPGTPDPDAEVVALSPTTLMATNRFVCEICNKGFQRDQNLQLHRRGHNLPWKLKQRLNKEVKKKVYICPEKSCVHHDPSRALGDLTGIKKHFSRKHGEKKWKCDKCSKKYAVQSDWKAHSKTCGTREYKCDCGTLFSRKDSFITHRAFCDALTEESARLTTSVAGAATNLNFGNETMLNNTMMHNGHAVQDDVSQISQYGQGLIRQDFNGLDHHHQQHEKPSLSLWLNQQQANSNSHQLNLMDNMAANPNQLYVTSSSSTAFPDMAQMPSANNLNQLFGSPNAMSTFGSSNINLFGSGSASSSTSTSAANNLSLSSPIQEGGIHKGNSNLVGSGGLSKPPMAPMSATALLQKA…
PmIDD6	pm__Pm005517	MMKGLMGDENMSNLTCASGDLSASNSSIRNESSSAGTLYPQQQSSSANDIQQPQQPPPPKKKRNLPGNPDPDAEVIALSPKSLMATNRFLCEICNKGFQREQNLQLHRRGHNLPWKLKQRTNKEVRKKVYLCPEPTCVHHDPSRALGDLTGIKKHFCRKHGEKKWKCEKCSKRYAVQSDWKAHSKICGTREYRCDCGTLFSRRDSFITHRAFCDALAQENSTSTAARSAMPMSINPLLSSLPQLHTHGLQGLSVKREQDQQQQLLPPWLSCLPEGEATAPSGLPSMNMSSPLFSASSFQQYYSFDHQNPNPSSSSTTTLPDFQQPHTASPHMSATALLQKASEMGATISKPSHSPMFLKPPSHQAHVSNEAFDDGFGSNDNKSSLLHDMMMMSNSFGDQ…
PmIDD7	pm__Pm001002	MMSEDGLSIPSTVKGLAQELSSSPNPNPNTDNQLKRKRNLPGTPGKYPDAEVIALSPKSLMATNRFVCEICNKGFQRDQNLQLHRRGHNLPWKLKQRSNKEVIRKKVYVCPERTCVHHEPSRALGDLTGIKKHFSRKHGEKKWKCEKCSKKYAVQSDWKAHSKVCGTREYRCDCGTLFSRKDSFITHRAFCDALAAEESARFGSASTNNMNPSFINGCNNITNINPHHQPPRIPHFIPMFQQEFSGSDPMAANNSHLNSNAFMPELVPTPSMDMFGSSSSSQTQWLINNNKFPEEASFNLSMSSSSLARGLKEELEESKGSLSETISASATSFYNNNNHQHQPMSATALLQKAAQMGSTRSNNNNNNPMTTFNDTAFGFMSTSSNSNQLSSYGHHHNKN…
PmIDD8	pm__Pm003292	MSIITGSAAGSFSSGNTGGEEVQQQQQQELLNHANFHGSNSFLSTTPPNINSNGTQPKQPTQAKRKRNLPGTPDPSAEVVALSPKTLMATNRFVCEICKKGFQRDQNLQLHRRGHNLPWKLKQRTSTEIIKRVYVCPEPSCVHHDPSRALGDLTGIKKHFCRKHGEKKWKCDKCSKKYAVQSDWKAHSKTCGTREYKCDCGTIFSRRDSFITHRAFCDAIAEENNTANQGVLMSNNINMGAPILQGQVSNSDLISPSSINNSNKTTNNPSTRSGTTSDQFNQNFDTKIPLSLVPQQPLPMSSKPLNMLPRSLNNNNNNTSSSSTSPLLFELSRGHGLIPSSSGHLSATELLQKAAQMGATMSSTSPSPSGTTITSMAPSTYGTTTAGGYNVNPFMQHRD…
PmIDD9	pm__Pm020252	MFPMMSNSTSLSEEANSLSSDFGPLNPLLLSTNISPHQSDHQHPYPTNKIKMKRSLPGNPDPDAEVIALSPKTLLATNRFVCEICNKGFQRDQNLQLHRRGHNLPWKLKQRNNKDQIRKRAYVCPEPSCVHHHPSRALGDLTGIKKHFCRKHGEKKWKCDKCSKIYAVQSDWKAHSKTCGTREYRCDCGTLFSRKDSFITHRAFCDALAEESAKLSASQLTATNTTTNPNIMTPQISLFPFQNPPPPFTTISLTPWDPPHHQNPNPNLNHHLIKTESHHHNHFPKTQSHKGLLTSPFQNLHLSTHPSSKPSTSSAHLSATALLQKAATVGSASSAAASAGQQAQSAGLTVGEFGTATHMNMISTDYLGEFTSGDLATWQKTDRLTRDFLGLTGDGTGNH…
PmIDD10	pm__Pm005950	MAASSSSVEPLFGIREEDQNQQMKQQHSSTPPTSSTAAAAAPPQKKKRNQPGTPSKTDPEAEVIALSPKTLMATNRFICEVCNKGFQREQNLQLHRRGHNLPWKLKQKTTKEPKRKVYLCPEPTCVHHDPSRALGDLTGIKKHFSRKHGEKKWKCEKCSKRYAVQSDWKAHSKTCGTREYRCDCGTLFSRRDSFITHRAFCDALAQESARHPPSLSTIGSSLYGGSLSNTGLGLSHQVVGPPQISSLQQDHSQSSTAADILRLGGAGAAGAARTGQFDHLLGSSFRPMAQSSASFFLTAADQSTQQQYHDHDQDKSFQGLMQFSDNHHHHHHHLHQNNNNSNNPPHHHSAGANLFSLPFLSNNTTNTTNNNNSATNNNLLISPDHFNTNVNGTTTAAGG…
PmIDD11	pm__Pm014215	MATNRFLCEICGKGFQRDQNLQLHRRGHNLPWKLKQRTNKEPRKRVYVCPEKSCVHHHPSRALGDLTGIKKHFCRKHGEKKWKCDKCSKRYAVQSDWKAHSKTCGTREYKCDCGTLFSRRDSFITHRAFCDALAEETARVNAASNMNNIPMGGNINYQYMGYSIGAVAGPNNNIMAQQYFSSIFKPMISTPNNIDDEASRGLSIWMMGGNNNYNNNKNHDHHRHCPPPSDYDQINNWVVGNKQLISSPSPYSISNSNAPHHQESITCTSTTTSSCSSSSLALISNNIISDVPSLYSSKMSATALLQKAAQIGSTTSSEAPLMGSFGINNISKVCGLYGVTSPDDHGHDHHAKRRSIQNCSAATTTTTNDHHHQQETIAAGGGGGQTRDFLGVGVHAICH…
PmIDD12	pm__Pm025274	MLPNNSSSSVPSSEPFSCLENGNTNKRKRRPMGTPDPDAEVVSLSPKTLLESDRYVCEICNQGFQRDQNLQMHRRRHKVPWKLLKRETPVVKKRVFVCPEPSCLHHDPCHALGDLVGIKKHFRRKHSNHKQWVCDKCSKGYAVQSDYKAHLKTCGTRGHSCDCGRVFSRVESFIEHQDACNMDRVRSESQALQPMACLSRTASSPSPSCSDNNFSRAPPNWPPPSNLVLPHPNPTEYTKLILTSTSPPMHPDHLQPTLVSNKALYNLDLQLATTSNNIPINEVSSVSSKREENHSTQLQLSIGSCDFGGGELHQNKNVEHSNFMITNRNYSPRDKEMRERESSSTTTNHHEHDDDQKPKPSAGISISAASSRLKEEAREQLRLAMAEKAYAEEARRQAE…
PmIDD13	pm__Pm005926	MLDNHTASSSAAPSSSSHDALENGGATHKRKRRPMGTPDPDAEVVSLSPKTLLESDRYVCEICNQGFQRDQNLQMHRRRHKVPWKLLKREIAQDQVIKKRVFVCPEPSCLHHDPCHALGDLVGIKKHFRRKHSNHKQWVCDKCSKGYAVQSDYKAHLKTCGTRGHSCDCGRVFSRVESFIEHQDTCTVRHVVRPEFQAALQPMCSSRTASSTSPSSDTNFSINNNNNNNLPQVLPGFPLRPNPTHHHDHQREHALNNPHSSCNQQQQQQVQNNILELQLLPSSNTRTTSPPNLDEKHATHLKLSIGSSSCDQRGDGKNDQTSQPSSSVIRRSSSNAEKMDGAGLTLEVARLKEFASEELKLAMAEKAYAEDARREAKRQIEMAELEFTNAKRMRQQALA…
RoIDD1	Bras_G01001	MPTDLDNSSTASGEASVSSSGNQTAPPPKPTTKKKRNLPGMPDPDAEVIALSPKTLMATNRFVCEICNKGFQRDQNLQLHRRGHNLPWKLRQRSSKEVKKRVYVCPEASCVHHDPSRALGDLTGIKKHFCRKHGEKKWKCDKCSKKYAVQSDWKAHSKICGTREYKCDCGTLFSRRDSFITHRAFCDALAEESARGQPQTQNVNLNSESDPKVQTVNSPPPPAPPAQVSVPSQPTPSSVPSQSAALPIQSTAAVAELPENPPQNLEEVPAVTQRKGHCSSSNSSSSNGSTSSSVFASLFASSTTSGASLQPPQPPAFTDLIRAMGQPDQPTDLAPSSSMEPISLGLSTSHASSIFGTAGQERRQYAPPPQPAMSATALLQKAAQMGAAATNASLLRGFG…
RoIDD2	Bras_G02393	MGELDNSSSLVGSTASGEATFSEAPAKKKRNLPGMPDPEAEVIALSPKTLMATNRFVCEICNKGFQRDQNLQLHRRGHNLPWKLRQRTTTEVRKRVYVCPEASCVHHNPTRALGDLTGIKKHFCRKHGEKKWKCERCSKKYAVQSDWKAHMKTCGTREYKCDCGTLFSRRDSFITHRAFCDALAEESAKAQTLGSSQLGNPNPNPAKAVVVASPPPPPLTPSNNVVSPALSIQSSEFPENPVGLSPPPPATTCLTTTTTAISTTATTTTSTGNCSNSSSSVFASIFAPSSTVSQTAAAANSSSFSNLVSSSAIPSVSAVEPTSLSLSTSLYLSNNGSSLFPTSDQQDHRHYTTSPQAPAMSATALLQKAAQMGAGASSGSFLRGFGLSTSSSPPQPQDL…
RoIDD3	Bras_G18834	MMSGDAYSLIPSTIEGFDHQLNAANPSQKSNPVVKKKRNLPGTPDPDAEVIALSPTTLMATNRFICEICNKGFQRDQNLQLHRRGHNLPWKLRQRTNKDVIKKKVYICPEKTCVHHDPSRALGDLTGIKKHFSRKHGEKKWKCEKCSKKYAVQSDWKAHSKTCGTREYKCDCGTLFSRKDSFITHRAFCDALTEESARLTSAAASATNLNFGDDHTLNNTMINSQPVQDVSQISDFEKPSRLSFWLNQQPNSLNVMDMAAANPNNLYEMVQMGSATNLFGSTSMANFGASTSTSSANHSLSSPIGLKDQEGGNLKANIISKPPAAPMSATALLQKAAQLGSTRSTNQSFSGSSLGVMSSPSSSNALSFNSRSNELNQLFQSSTSSSDMISSLSCSSNST…
RoIDD4	Bras_G09104	MKALLFQQQQVDETMSNLTSASGDQASVSSGNRSTEIGTSSFSQQYFPPPPPQASTPGVKRKRNQPGNPDPDAEVIALSPKTLMATNRFICEICNKGFQRDQNLQLHRRGHNLPWKLKQRTSKEVRKKVYVCPEASCVHHDPSRALGDLTGIKKHFFRKHGEKKWKCEKCSKKYAVQSDWKAHSKTCGTREYRCDCGTLFSRRDSFITHRAFCDALAEESARAINPAATPANPLFSSQQSQSHMAGGPHINFNPHGQDLHAYNTALMKKEHNDQQISSFSSTTSLLPPWLAAGPPPNTIFSGNHNFQQNLELGPNPNPSAGPTLPQFQVPAALSSPPHMSATALLQKAAQMGATMSSSTSASVSVPAGIMTRAHHQGHVSDFGGHVSAATAGVHLHHQQ…
RoIDD5	Bras_G15270	MSIITGSGVGSFSSGNTTSAEEAVLQQQEELLNHFHGSNSLQEIAINGISAPQQQHPPPAKKKRNLPGTPDPSAEVIALSPKTLMATNRFVCEICKKGFQRDQNLQLHRRGHNLPWKLKQRSSTEIRKRVYVCPEPACVHHDPSRALGDLTGIKKHFCRKHGEKKWKCDKCSKKYAVQSDWKAHSKTCGTREYKCDCGTVFSRRDSFITHRAFCDAIAEENKTVLNQGQCIPVRSNNILGQQNTQQGGDQVVSGSELMISASMTMTNNEAATKPSTRSSTSDQFDTKIPNLTLVPQEVASNMSSTPTSGLNNNSLSSSTSSALFHNHHGHQVLLPSSISGFSSATELLQKAAQMGATMSSNNSSGMSMAPSTYGDEFTRYVNNQFMQHKNGGNIIPVQE…
RoIDD6	Bras_G04489	MQPTNYQQGGNQLIMMKGFAVDENMSNLTCASGDLSASANSSIRNESSSSTHQQQPTQKKKRNLPGNPDPDAEVIALSPKSLMATNRFVCEVCNKGFQREQNLQLHRRGHNLPWKLKQRTNKEVKKKVYLCPEPTCVHHDPSRALGDLTGIKKHFSRKHGEKKWKCEKCSKRYAVQSDWKAHSKICGTREYRCDCGTLFSRRDSFITHRAFCDALAQENSNAARAMNPLNLSSSSLPQLHGGFQPHLSHHHVKREVQDLQLQLPLWMGGEAAPPAGPSHHLHSNINLSSSSSQLFSTSSFDHQQSFLHQNPNPSSSAGLPDFQTAASAHMSATALLQKASEMGATVSKPSSMFLKPRNQQHQTSHMMSETTAFGSFMEQAGANSGGGAAAATNNSLLHD…
RoIDD7	Bras_G04031	MFPSVAAMSNSTSLSTEEAASVSSGSRLPDHFACLNSLSVSTITSSPQDHQQPQKIKKKRSLPGNPDPDAEVIALSPKTLLATNRFVCEICNKGFQRDQNLQLHRRGHNLPWKLKQRSSKDLIRKRAYVCPEPSCVHHHPSRALGDLTGIKKHFCRKHGEKKWKCDKCSKIYAVQSDWKAHSKTCGTREYRCDCGTLFSRKDSFITHRAFCDALAEESARISASQLAIATSTTNHITPQISLFPFPNHPHFTNPPPLPFTTLTPWDPPQNPNPNTTHNPLHHHIKPEETHHHFPLNPPLFQDTHKGLITSPFQNLHVGTQPSTNVATSAHLSATALLQKAATIGASAAAQQQTQSAGLAEFGTAEYLGGFTSGDIATWQKTDRLTRDFLGLTSADGNGC…
RoIDD8	Bras_G07059	MSNITGDIEEGSFSSGNTAGEEVHQEKQLQNHLHGSNSGGGSGGGKNPSAEVIALSPTTLMATNRFVCEICNKGFQRDQNLQLHRRGHNLPWKLRQRTSTEVRKRVYICPEPTCVHHNPARALGDLTGIKKHFSRKHGEKKWKCDKCSKKYAVQSDWKAHQKTCGTREYKCDCGTIFSRRDSFITHRAFCDALAEENNKVNHGLIMNTNNLGTHHQMPDHLISSMPMNTNTSMGIGAAAISEYNNYDPKNPLKSLPEDLVPMPFKSIMNTNLPAGGGMFSSSSGSLFGGPRSVNSSTSSSLQLSSNNSSSSGFNYLQDSKNGCGGSPNVTGSAQMSATALLQKAAQMGATASNTTINSPMMQKSFVTSMAGPENHHLLSTSSINVTRPPYDHHHHFQQV…
RoIDD9	Bras_G25466	MGFFKTQLQYLDPILLLSKRRETSQETQANPEAEVIALSPKTLMATNRFLCEICGKGFQRDQNLQLHRRGHNLPWKLKQRTSKEPRKRVYVCPEKSCVHHHPSRALGDLTGIKKHFCRKHGEKKWKCEKCSKRYAVQSDWKAHSKTCGTREYKCDCGTLFSRRDSFITHRAFCDALAEETARVNAVSNIHNNAMLSNTNYHSYMGNNASSLLLGPPNMAQLQFSSIFKPISSNDATDAMSRGLSLWMGQGSNEEITVNNQNQHQHQLGSVSSSAGSIFGDPNNISVSCSEPPPPSDHYQLNWVLGSNNKLSSSNNAHHQDQLTITSSAAANSLPSLYTHQTPSANMSATALLQKAAQIGATSTDTSSLLGSFGLKCNSNSTTASQGVTQVQDGSKVCGL…
RoIDD10	Bras_G00453	MAASSSSLFGIREEDQNQMKQQQHSSSTPTSSAAAAPPAPPPQKKKRNQPGTPSNLCCLSFFITDPEAEVIALSPKTLMATNRFVCEVCNKGFQREQNLQLHRRGHNLPWKLKQKTTKEPKRKVYLCPEPTCVHHDPSRALGDLTGIKKHFSRKHGEKKWKCEKCSKRYAVQSDWKAHSKTCGTREYRCDCGTLFSRRDSFITHRAFCDALAQESARHQPSLSSLGSNLYGGTNNTGLALSHHHHQHQQVVGPQIPDHHHHHNNQSTAADILRLGGGGNARTGHFDHLLSPPPMGSSFRPAQSSASFFINQDQSNQQYHHDQDKQFHGLMQFSDHDPNNNSSTGGNLFNLPFLSNSSNSAAGGNNSNLLIHPDHQFNSNGGGGGGEGGSNLFSSHMVGG…
RoIDD11	Bras_G00454	MAAASSSMAFFGNSREENHNQMTLQQPPPASSTASIATGAPTAPPPQKKRRNQPGNPSKFICEVCNKGFQREQNLQLHRRGHNLPWKLKQKTNKEPKRKVYLCPEPTCVHHDPSRALGDLTGIKKHFSRKHGEKKWKCEKCSKRYAVQSDWKAHSKTCGTREYRCDCGTLFSRRDSFITHRAFCDALAQESARHPSSLSAMATSTHLYPGNNQMMSLGLSQIGGGSSLPPNNMLRLGTAGAGGAAKFEHLMNPSSFGQGQPMPNSSSSFFNQGFQDQQQSLNGQFSANKSLHGLMQLPDLQSHTTSNNSPSSTTTAAGSLFNLGFFSNNNSDHHQFSDGNGGSQGTTLFPNSMGDHIGSGLPSSLFGNSLQNENMNGAHMSATALLQKAAQMGSTTSTE…
RoIDD12	Bras_G07491	MMSSEDGLSVPSTISRGFLHQEPNPTTNPNPNTTNQALKRKRNLPGTPGKYCIFLCEICNKGFQRDQNLQLHRRGHNLPWKLKQRSKLEVIRKKVYVCPEKSCVHHEPSRALGDLTGIKKHFSRKHGEKKWKCEKCSKKYAVQSDWKAHSKICGTREYRCDCGTLFSRKDSFVTHRAFCDALAAEESARFGSTSTTTNMNIPSFINGSITHNHQHQQPRNIPHFLPIFQHQQQPEYSGSDQLSAANLGLPEMVQTVSSMDMFGQSSSQNQWLNKFPEASFTNGNLSISSLMPRGLKEEEDSKANLNLSGSMSSSSFYNNNESPSHMSATALLQKAAQMGSTTSNNDDVVPAAFGFMNSSPYSHNKNDDNFNVLLNSLSSSTQIGDGSSSLFSTSFLSSK…
RoIDD13	Bras_G03660	MLANNSSSSVPCSEPFSCLENGNNNKRKRRPAGTPDPDAEVVSLSPKTLLESDRYVCEICNQGFQRDQNLQMHRRRHKVPWKLLKRETPVVRKRVFVCPEPSCLHHDPCHALGDLVGIKKHFRRKHSNHKQWVCEKCSKGYAVQSDYKAHLKTCGTRGHSCDCGRVFSRVESFIEHQDACNMDRLRSESQAVVLQPACLSRTASSPSPSSETNFSSRTTPNWHCAPALVVPKPIHDDTKLILTSPPAGHGIGDRHRTSSKNVNANSLYNLDLQLATTSNANNPNNIEVSVSSSSKRDVENHSTQLQLSIGSCDNFGDNHLHYQKNIYIESNRNSPRESSTSTNDHHRQQMKPAGASTSRLIKEEAREQLRLAMAEKVYAEEARQQAEQQIELAEQEFAN…
RoIDD14	Bras_G00429	MLANHNHTNTSAAPSSSSDHGFSTPLENGGAATNKRKRRPAGTPDPDAEVVSLSPKTLLESDRYVCEICNQGFQRDQNLQMHRRRHKVPWKLLKREIQDQVKKRVFVCPEPSCLHHDPCHALGDLVGIKKHFRRKHSNHKQWVCDKCSKAYAVQSDYKAHLKTCGTRGHSCDCGRVFSRVESFIEHQDTCSVRHVVRPELQALQPAAACSSRTASSTSPSSDGHFSINNNAPAPPPPLPGLPVMPKPSDLPVVFISSDEGHDGIPSTSNHHQQQQQQQKEQVHMLELKLLPWSDTQTSPRHEDEHYATHLKLSIGGSSSGGEQKNDSPRSCSREKNANASVGVGPINWEVARLKDFASEELKLAMAEKAYAEEARREAKRQIEMAELEFGNAKRIRQQA…
PaIDD1	Pav_sc0001175.1	MPTDLDNSSTASGEASVSSSGNQTAPPKPTTKKKRNLPGMPDPDAEVIALSPKTLLATNRFVCEICNKGFQRDQNLQLHRRGHNLPWKLRQRSSKEVKKRVYVCPEPSCVHHDPSRALGDLTGIKKHFCRKHGEKKWKCDKCSKKYAVQSDWKAHSKICGTREYKCDCGTLFSRRDSFITHRAFCDALAEESARGHTQTPTQTQTEVNLNSESDPKAQNANSPPQPPPQAPVPSQATTSSVPSQSAGLLSSPMPTTQNPAMGNPDRTTDLAPSSSVEPISLGLSTSHGSSLFGPAGQERRQYAPPPQPAMSATALLQKAAQMGAAATNASLLRGFGIMSSSSASAQQENLQWSQRQAEPDSASVAAGLGLALPCDGGSGWKELMMGSPSMFGPKQTTLD…
PaIDD2	Pav_sc0002375.1	MGDLDNSSSPLLTVSTASGEASLSSSAHETMTLPEPPAKKKRNLPGMPDPEAEVIALSPTTLLATNRFVCEICNKGFQRDQNLQLHRRGHNLPWKLRQRTTKEVRKRVYVCPETSCVHHNPTRALGDLTGIKKHFCRKHGEKKWKCERCSKKYAVQSDWKAHMKTCGTREYRCDCGTLFSRRDSFITHRAFCDALAEESAKAQTLAIDGSDGNQNSNLNNQSPNPNAKGVVASPPPPPLTPSNTVVSPALSIQSSELPENPIGLSPPTPATTCLTTTAISTTTTTTTTTTTTTSTGNCNNGSSVFASIFAPSTASALISQPPQTSSPSSFSNQVSTLGRPDGSTTIPTVSSINEPTSLSLSTSLYLSSNGSSLFPTPEPQDHRHYTQPAVMSATALLQK…
PaIDD3	Pav_sc0000893.1	MAAASSSIPFFGSTSSREETQSQMTSTLQQHSSATPSSNTTAAAAAPPPQKKRRNQPGNPNPDAEVIALSPKTLMATNRFICEVCNKGFQREQNLQLHRRGHNLPWKLKQKTTKEPRRKVYLCPEPTCVHHDPSRALGDLTGIKKHFSRKHGEKKWKCEKCSKRYAVQSDWKAHSKTCGTREYRCDCGTLFSRRDSFITHRAFCDALAQESARHPSSLNTMGGQLYGHNHMSLGLSQIPSLQNQTHLPNNMLRLGNAGGAKFEHLITPSNPSSFGSQAMPNSSNFFMRDIANQQGFQDQHQFPSKAALHGLMQLPDLQSNGNNNNSPSSTSAANLFNLSFFSNNSTSSSLTPPDHQFSDGNGGGQGFSMGAADHHNMGSATLPSLYGNSMQHESNIAPH…
PaIDD4	Pav_sc0000689.1	MMKGLMFQQQQQQQQQHSQLVDENMSNLTSASGEAASVSSGNRNEIGTSFSQQFFAPPPSQTQPALKKKRNLPGNPDPEAEVITLSPKTLMATNRFICEICNKGFQRDQNLQLHRRGHNLPWKLKQRTSKEVRKKVYVCPEASCVHHDPSRALGDLTGIKKHFCRKHGEKKWKCDKCSKRYAVQSDWKAHSKTCGTREYRCDCGTLFSRRDSFITHRAFCDALAEESARAITTGNNNPLLISPQQQQLQQPGSSSASHHHHMNLNQVQLAHQFQDLHGFSLKKEQQSFTSLRPDLPPWLACPGPPNNTSIDLSSSSSIFSTRLDQNFTQTHQDLSLHDHNSTAPNPNPNPNPSLGPTLPPFQPAPSPHMSATALLQKAAQMGATMSSKNSTASAAAATS…
PaIDD5	Pav_sc0000046.1	MALNEESIPPMNGFVQDPAAGSISPPPPPPAKKKRNLPGNPGKLLSFPNPEAEVIALSPKTLMATNRFLCEICGKGFQRDQNLQLHRRGHNLPWKLKQRTNKEPRKRVYVCPEKSCVHHHPSRALGDLTGIKKHFCRKHGEKKWKCDKCSKRYAVQSDWKAHSKTCGTREYKCDCGTLFSRRDSFITHRAFCDALAEETARVNAASNMNNIPMGGNINYQYMGYSIGAVAGPNNNITAQQYFSSIFKPMISTHNNIDDEASRGLSIGMMGGNNNYNNNKNHDHHRPCPPPSDYDQIDNWVVGNKQLISSPSPYSISNSNAPHHQESITCTSTASSSCSSSSLALISNNIISDVPSLYSSNMSATALLQKAAQIGSTTSSEETLLGSFGMNNISKVCGLY…
PaIDD6	Pav_sc0000094.1	MMSEDGLSIPSTIKGLAQELSSSPNPNPNADNQLKRKRNLPGTPGKYPDAEVIALSPKSLMATNRFVCEICNKGFQRDQNLQLHRRGHNLPWKLKQRSNKEVIRKKVYVCPERTCVHHEPSRALGDLTGIKKHFSRKHGEKKWKCEKCSKKYAVQSDWKAHSKVCGTREYRCDCGTLFSRKDSFITHRAFCDALAAEESARFGSASTTNMNPSFINGCNNITNINPHHQTPRIPHFIPMFQQEFAGSDPAAANNSHLNSNAFMPELVPTASMDMFGSSSSSQTQWLINNNKFPEEASFNLSMSSSSLARGLKEELEESKGSLSETISASATSFYNNNNHQHQPMSATALLQKAAQMGSTRSNNNNNPATTFNDTAFGFMSTSSNSSNMSNQLSSYGHHH…
PaIDD7	Pav_sc0006080.1	MSIITGSAAGSLSSGNTGGEEVQQQQQQELLNHANFHGSNSFLSTTPPNINSNGTQPKQPPQPKRKRNLPGTPDPSAEVVALSPKTLMATNRFVCEICKKGFQRDQNLQLHRRGHNLPWKLKQRTSTEIIKRVYVCPEPSCVHHDPSRALGDLTGIKKHFCRKHGEKKWKCDKCSKKYAVQSDWKAHSKTCGTREYKCDCGTIFSRRDSFITHRAFCDAIAEENNTANQGVLMSNNINMGAPILQGQVSNSDLISPSSINNSNKTTNNPSTRSSTTSDQFNHNFDTKIPLSLVPQQPLPMSSKPLNMLPRSLNNNNNTSSSSPSPLLFELSRGHGLIPSSSGHLSATELLQKAAQMGATMSSTSPSPSGTTITSMAPSTYGTTTTGGYNVNPFMQHRDH…
PaIDD8	Pav_sc0000848.1	MSNITGDVEEGSFSSGNNTGELEVHQENQQQNHLQASGSGGASGAQSNSNDPSAEVIALSPTTLMATNRFVCEICNKGFQRDQNLQLHRRGHNLPWKLRQRTTTEVRKRVYICPEPTCVHHNPARALGDLTGIKKHFSRKHGEKKWKCDKCSKKYAVQSDWKAHQKTCGTREYKCDCGTIFSRRDSFITHRAFCDALAEENNKVNHGLMSSQTQMPLPHDQLISSMAMNTNSSMGGGSDVLNYDISNKNSLNKSFPDDLVPMPFKSMNMNIMAGGGGGGPGMFSSTSGSLFGGPRSVSSASASSLQLSSNNNNNNSSSGFNYLHHQETKNGGSTQSNITGAAQMSATALLQKAAQMGATASNSTINSPMMQKSFVSSMAGPDQLSVNPISINNNNNNNN…
PaIDD9	Pav_sc0000893.1	MAASSSSVAPLFGIREEDQNQQMKQQHSSTPPTSSTAAAAAPPQKKKRNQPGTPSKTDPEAEVIALSPKTLMATNRFICEVCNKGFQREQNLQLHRRGHNLPWKLKQKTTKEPKRKVYLCPEPTCVHHDPSRALGDLTGIKKHFSRKHGEKKWKCEKCSKRYAVQSDWKAHSKTCGTREYRCDCGTLFSRRDSFITHRAFCDALAQESARHPPSLSTIGSSLYGGSLSNTGLGLSHQVVGPPQISSLQQDHSQSSTAADILRLGGAGGAGAARTGQFDHLLGSSFRPAAQSSASFFLTAADQSTQQQYHDHDQDKSFQGLMQFSDHHHHHLHQNNNNSNNPPHHHSAGANLFSLPFLSNNTTNTTNNNNLLISPDHFNTNANGTTTAAGGSEGSHNLFS…
PaIDD10	Pav_sc0000203.1	MATNRFVCEICNKGFQRDQNLQLHRRGHNLPWKLKQRLNKEVKKKVYICPEKSCVHHDPSRALGDLTGIKKHFSRKHGEKKWKCDKCSKKYAVQSDWKAHSKTCGTREYKCDCGTLFSRKDSFITHRAFCDALTEESARLTSSVAGAATNLNFGNETMLNNTMMHNSHAVQDDVSQISQYGQGLIRQDFNGLDHHHHQHEKPSLSLWLNQQQANSNSHQLNLMDNMAANPNQLYVTSSSSTAFPDMAQMPSANNLNQLFGSPNAMSTFGSSNTNLFGSGSASSSTSTSAANNLSLSSPIQEGGGGANSNTSSTLEQLMNNITHRGSSTIGNLDHQNSLTRDFLGMGGGGGAADQLSHNNRPMFSPQELAKFASSMSQFTGNH
PaIDD11	Pav_sc0000103.1	MLPNNSSSSVPSSEPFSCLENGNTNKRKRRPAGTPDPDAEVVSLSPKTLLESDRYVCEICNQGFQRDQNLQMHRRRHKVPWKLLKRETPVVKKRVFVCPEPSCLHHDPCHALGDLVGIKKHFRRKHSNHKQWVCDKCSKGYAVQSDYKAHLKTCGTRGHSCDCGRVFSRVESFIEHQDACNMDRVRSESQALQPAACLSRTASSPSPSCSDNNFSRAPPNWPPPSNLVLPHPNPTEYTKLILTSTSPPAHPDHLQPSLVSKKALYNLDLQLATTSNNIPINEVSSVSSKREENHSTQLQLSIGSCDFGGGELHQNKIVEHSNFMITNRNYSPRDKEMRERESSSTTTNNHEHDDDQKPKPSAGISISAASSRLKEEAREQLRLAMAEKAYAEEARRQAE…
MdIDD1	MDP0000233477	MQVNQYITLNFWERDPATCSPFNPTCRGTQLVSPRVSFGQRPIRTELVDWKFKKIKEEKIKISALMPTDLDNSSTASGEASVSSSGNQTAPPKPATKKKRNLPGMPDPDAEVIALSPKTLMATNRFVCEICSKGFQRDQNLQLHRRGHNLPWKLRQRSGKEVKKRVYVCPEASCVHHDPSRALGDLTGIKKHFCRKHGEKKWKCDKCSKKYAVQSDWKAHSKICGTREYKCDCGTLFSRRDSFITHRAFCDALAEESAKAHTPTATAAAATAVNLNSESDPKTQSANSPPQAPPPPPQAAAPPQPTTSSVPSVSAGVLSSSLPAQSTVRELPENPTQIVEEAQVVAGRKGNRSSSSSSSSNGSTSSGVFASLFTSSTASASLQPPQQPAFTDLIRAMGH…
MdIDD2	MDP0000122321	MSEDALLVPSTITGFAQEPDSNLNPNPNINNQFKRKRNPDAEVIAMSPKSLMATNRFVCEVCNKGFQRDQNLQLHRRGHNLPWKLKQRSKTEVIRKKVYVCPEKTCVHHEPSRALGDLTGIKKHFSRKHGEKKWKCEKCSKKYAVQSDWKAHSKVCGTREYRCDCGTLFSRKDSFITHRAFCDALAAEQSARFCSASTINPSFMNGSITNNAHQPQSIPNFIPMFQSEFAGSDHPAANNSHLSSNAFMPVMLQTASMDMFGPSSSSSQMQWLINNKKFVEESSFANANNLSLSSPLIIRGVLKEEEESKGSFSETITTTTTSFYNYNINNNQNHHQQKPMSATALQKAARMGSTTSNNPATTFNDTAFNFNDLVNSMSPSSTQGDTIGDGSLFLSNKHL…
MdIDD3	MDP0000150936	MFPISMSNSTSLSEEGNSVSSDFAAALNPLLLSTNISPHQHDQPPNKIKKKRSLPGNPDPDAEVIALSPKTLLATNRFVCEICNKGFQRDQNLQLHRRGHNLPWKLKQRNSKDQIRKRAYVCPEPSCVHHHPSRALGDLTGIKKHFCRKHGEKKWKCDKCSKIYAVQSDWKAHSKTCGTREYRCDCGTLFSRQRVIMKTDESAKNICCCPPSSVAFFFLINYTCPNNLFVVFHLRRSRIKQMKDSFITHRAFCDALAEESARLSANQFATASITAATIKPQISLFPFPTHQQQHFTNPNPPLPPFTTISLTQWPPPHQNPNPSPNPTQNPLHHLIKPESHPHFPPPPQPHKGLIISPFQNLHVSSQPNSNPTTSSAHLSATALLQKAATVGAAVASGAQ…
MdIDD4	MDP0000209426	MPNITGDVEEGSFSSGNNTGELEVHQDQQQNHLHGSNSGGASGAQSNSNGSVTHQQPQQPPLKKKRNLPGTPGKYFYVETHHWTLRVITGECLPIFGAMLESYPTAEVIALSPTTLMATNRFVCEICNKGFQRDQNLQLHRRGHNLPWKLRQRTTTEVRKRVYICPEPTCVHHNPARALGDLTGIKKHFSRKHGEKKWKCEKCSKKYAVQSDWKAHQKTCGTREYKCDCGTIFSRRDSFITHRAFCDALAEENNKVNQMPMPHDQLISSMAMNTNTSPMGGGVSEFLSYDINTNKNKLPEDLVPMPFKSMNMNIPGGGGGGGGPGMFSNTTGSLFGGPRSVSSTSASSLQLSSNNNNNSSSGFNYLHHQETKNGGSSLSSITGAAQMSATALLQKAAKM…
MdIDD5	MDP0000826293	MSGDGFSINMSSAIDGFAQDHQLNDNPSGGLKPNPPNAVAKKKRNLPGTPDPDAEVIGLSPTTLMATNRFVCEICNKGFQRDQNLQLHRRGHNLPWKLKQRLNKEVKKKVYICPEKTCVHHDPSRALGDLTGIKKHFSRKHGEKKWKCEKCSKKYAVQSDWKAHSKTCGTREYKCDCGTLFSRKDSFITHRAFCDALTEESARLTTSSVTGVHTNLNFGNDAMLNNPMMNNSQAVVQDASQISMQYGQGLMRQDFNGLDQLHQHEKPRLSLWLNQQATSNSNQVNLIDDMQANPNHPLYVTSSSSNAFPEMVQMPSSSNNVNLFGSSNSMPTFGASTNGANLSLSPGQESGTSKLIGKNSNLVGSGVSKPPAAPMSATALLQKAAQLGSTRSSNNQGSS…
MdIDD6	MDP0000150618	MSIITGSAATGSFSSGNTGGEEVQQQQQELLNHHANFHGSNSLLPTTPNINSNGISTTQVQKQPPPAKKKRNLPGTPDPTAEVIALSPKTLMATNRFVCEICKKGFQRDQNLQLHRRGHNLPWKLKQRTSTEIIKRVYICPESSCVHHDPSRALGDLTGIKKHFFRKHGEKTWKCDKCSKKYAVQSDWKAHLKTCGTREYKCDCGTIFSRRDSFITHRAFCDAIAEENNRNQGVVPMSNNIMGAPNQGQLSNSELIIPASPPMNNKITDNPSSARSDTTTSDQFHHNFDAKNAPLTLEPQQPFPMPTKPVNMLPRTLSNNTSSSTSPSSLLFGLNHGGHGQSLIPNSSGHLSATQLLQKAAQMGATMSGGPNPNPSGTTITSMAPSTYGTATGGYNMNP…
MdIDD7	MDP0000373134	MGELDNSSSPLLTVSTASGGEASLTSSTHEAMTHPEPQQKKKRNLPGMPDPEAEVIALSPTTLLATNRFVCEICSKGFQRDQNLQLHRRGHNLPWKLKQRTSKEVRKRVYVCPETSCVHHHPTRALGDLTGIKKHFCRKHGEKKWKCERCSKKYAVQSDWKAHMKTCGTREYKCDCGTLFSRCVRDSFITHRAFCDALAEESAKTQTLVIGPDGSMNPNSNPTPSARSGVVASPPPPPHTPSNTVVSPALSIQSSDLPENPIGLSPPAPATSCLTTTAISTTATATTSTGNCNNGSSVFASIFAPSSASALIQPPGPPQTSSSFSNQSALGRPDGSTKISSVEPTSLSLSSSLYLSSNGSSLFPTPDQDHRNYAQPAAMSATALLQKAAQMGATSNASL…
MdIDD8	MDP0000265846	MGELDNSSSPLPTVSTASGGEASLTSSAREAMTRSEPPQKKKRNLPGMPDPEADVIALSPTTLLATNRFVCEICSKGFQRDQNLQLHRRGHNLPWKLKQRTSKEVRKRVYVCPETSCVHHNPTRALGDTGIKKHFCRKHGEKKWKCERCSKKYAVQSDWKAHMKTCGTREYRCDCGTLFSRRDSFITHRAFCDALAEESAKTQTLMIGSDGSTNPSSNPTPSAKSTVVASPPPPPHTPSNTVVSPALSIQSSELPENPIGLSPPAPATTCLTTKAISTTATATTSTGNCNNGSSVFASVFAPSSASALMTQPPQASSPSSFTNQVSTLGRLDGSTTTSAINEPTSLSLSTSLYLSSSGFSLFPTPDQQDHRDYAQPAAMSATALLQKAAEMGAAASNAS…
MdIDD9	MDP0000171492	MVDENMSNLTCASGDLSASNSSIRNESSSAGTVYPQHSASSTQIQQQQAPPPPKKKRNLPGNPDPDAEVIALSPKSLMATNRFVCEICNKGFQREQNLQLHRRGHNLPWKLKQRTGKEVRKKVYLCPEPTCVHHDPSRALGDLTGIKKHFSRKHGEKKWKCEKCSKRYAVQSDWKAHSKVCGTREYRCDCGTLFSRRDSFITHRAFCDALAQENSTSTAAARSAMPASINPILSSLPHIHSHGLQALSAVKREQDQHQHQHQHQQHQHPQHLPPWLSCLPEGGEAASLPTMNLSASPLFSTSSFQQYYSFDQNPNPSGSSTTLLPDNFQVQQTLAPPHMSATALLQKASEMGATISKPSPSPYFLKPPTHQSHQAMSNETSRDQAILLDDGFGNNEKSS…
MdIDD10	MDP0000480293	MSEDRLVPSIITGFQEPDSSPNPNPNTNNQLKRKRSLPGTPGKYPDAEVIAMSPKSLMATNRFVCEICNKGFQRDQNLQLHRRGHNLPWKLKQRSKTEVIRKKVYVCPEKTCVHHEPSRALGDLTGIKKHFSRKHGEKKWKCEKCSKKYAVQSDWKAHSKVCGTREYRCDCGTLFSRKDSFITHRAFCDALAAEQSARFCSAPTTNNINPSFMNGSIANNTHKPQRIPHFIPMFQPEFAGSDHLAANNHLSSNAFIPEMQTASMDMFGSSSSSQMQWLINNNKFVEESSFANANSLSMSSPSLLRGVLKEDEESKGSFSETISTTTNTSFYTNNNNKQNHHHHHQPMSATALLQKAARMGSTTSNNNNPATTFNDTTLNFNDMVNSTSSSSTQGATIED…
MdIDD11	MDP0000243664	MDDVSSVLISKTIKTLMRLRSSILFHLSYTIIKVSKFITQPITTNKLNFQMMSEDRLVPSIITGFQEPDSSPNPNPNTNNQLKRKRNPDAEVIAMSPKSLMATNRFVCEICNKGFQRDQNLQLHRRGHNLPWKLKQRSKTEVIRKKVYVCPEKTCVHHEPSRALGDLTGIKKHFSRKHGEKKWKCEKCSKKYAVQSDWKAHSKVCGTREYRCDCGTLFSRKDSFITHRAFCDALAAEQSARFCSAPTTNNINPSFMNGSIANNTHKPQRIPHFIPMFQPEFAGSDHLAANNHLSSNAFIPEMQTASMDMFGSSSSSQMQWLINNNKFVEESSFANANSLSMSSPSLLRGVLKEDEESKGSFSETISTTTNTSFYTNNNNKQNHHHHHQPMSATALLQKA…
MdIDD12	MDP0000319344	MFPISMSNSTSLSEEANSVSSDFAAALNPLLLSTNISSHQSDQPPNKIKKKRSLPGNPDPDAEVIALSPKTLLATNRFVCEICNKGFQRDQNLQLHRRGHNLPWKLKQRNSNDQIRKRAYVCPEPSCVHHHPSRALGDLTGIKKHFCRKHGEKKWKCDKCSKIYAVQSDWKAHSKTCGTREYRCDCGTLFSRKDSFITHRAFCDALAEESARLSANQFATATTTTAAITPQISLFPFPTHQQQHFTNPNTPMPPFTTIPLTPWDLPQSHQNPNSNPTQNSPLHHLIKPESHRHFPPRPPQPQQPHNGLITSPFQNLHVSTQPNSNPATSSAHLSATALLQKAAAVGAAAAQQGQSAGLTVGEFGTASHMISTEYLGGFTSGDVSTWRKTDSLTRDFLGL…
MdIDD13	MDP0000161241	MSNITGDVEEGSFSSGNNTGELEVRQDQKQQENHLHRSSSGGASGAQSNNPSAEVIALSPTTLMATNRFVCEICNKGFQRDQNLQLHRRGHNLPWKLRQRTTTEVRKRVYICPEPTCVHHNPARALGDLTGIKKHFSRKHGEKKWKCDKCSKKYAVQSDWKAHQKTCGTREYKCDCGTIFSRRDSFITHRAFCDALAEENNKVNQMSMPHDQLISSTAMNTSTSTMGGGGVSEFLNYDINPNKNKLPEDLVPMPFKSMNMNMNIPGGGGGPGMFSSTAGSLFGGPRSVSSTSASSLQLSSNNNNNSSSGFNYLHNQEIKNGGSSLSSITGAAQMSATALLQKAAQMGASASNSTINSPMMQKSFVSSMAGPDHGHLSSPNSLLNNNIRPPPSYDHQPHH…
MdIDD14	MDP0000688613	MAKNRFVCEICNKGFQRDQNLQLHRRGHNLPWKLKSRLNKEVKKKVYICPEKTCVHHDPSRALGDLTGIKKHFSRKHGEKKWKCEKCSKKYAVQSDWKAHSKTCGTREYKCDCGTLFSRKDSFITHRAFCDALTEESARLATSSVAGAPTNLNFGNDAMLNNPMMNNSQVVQDVSQISMQYEQGLMRQDFNVLDQLHQHEKSRLSLWLNQQANSNSNQINLMDDMQANPNHPLYVTSSSSNTFPEMVQMPSSSNNVNLFGSSDSMSTFGASTRGNLSLSPVQESGKKLIGNNSNLVGSSSKPPAPMSATALLQKAAQSGSTRSSNNQGSSLGVNVMSSSSFSNTLMGFSNLNQDRSNELHFVQNAQGGSANLSSLTSSSSHTSSTTLEQLMNTIQRGSK…
MdIDD15	MDP0000136195	MAASSSSGAPLFGIREEDQNQKMRQQHSSTTPTSSTAAPAAPPQKKRRNQPGTPSKTDPEAEVVALSPKTLMATNRFICEVCNKGFQREQNLQLHRRGHNLPWKLKQKTTKEPKRKVYLCPEPTCVHHDPSRALGDLTGIKKHYFRKHGEKKWKCEKCSKRYAVQSDWKAHSKTCGTREYRCDCGTLFSRSQFMTLQEFEVVCEYRRDSFITHRAFCDALAQESARHPPSLTTIGSSLYGGGSLSNTGLGLSHQVVGPPHQLSSLDHSNQPSDILRLGGSSGAAAADRAGQFDHLLSSPSMGSSFRPAQSSAASFFMTGASDHDQSNQQQYHDQDKSFHGLMQFTHHSPHQHHSGAGTNLFNVPFVSNSTNSNSASNSSLISPNHFNTNANGSAGGGNE…
MdIDD16	MDP0000158195	MAASSSSGAPLFGIREEDQNQKMRQQHSSTTPTSSTAAPAAPPQKKRRNQPGTPSKTDPEAEVVALSPKTLMATNRFICEVCNKGFQREQNLQLHRRGHNLPWKLKQKTTKEPKRKVYLCPEPTCVHHDPSRALGDLTGIKKHYFRKHGEKKWKCEKCSKRYAVQSDWKAHSKTCGTREYRCDCGTLFSRRDSFITHRAFCDALAQESARHPPSLTTIGSSLYGGGSLSNTGLGLSHQVVGPPHQLSSLDHSNQPSDILRLGGSSGAAAADRAGQFDHLLSSPSMGSSFRPAQSSAASFFMTGASDHDQSNQQQYHDQDKSFHGLMQFTHHSPHQHHSGAGTNLFNVPFVSNSTNSNSASNSSLISPNHFNTNANGSAGGGNEVSNNLFAGHIMGGGDH…
MdIDD17	MDP0000137126	MPDPDAEVIALSPKTLLATNRFVCEICSKGFQRDQNLQLHRRGHNLPWKLRQRSSKEVKKRVYVCPEASCVHHDPSRALGDLTGIKKHFCRKHGEKKWKCDKCSKKYAVQSDWKAHSKICGTREYKCDCGTLFSRRDSFITHRAFCDALAEESARPTTTSATAAATTAAATAVNLNSESDPRAQSVNSPPQPLPSPPPPAAAPPQPTTSSVPSQSAGVLSSSPPTQSPVIQKPKREDSSSNSSSSNGSTSSGVFASLFASSTTSASLQPPQQPAFTDLIRAMGHPDQSTNLAPSSSMEPISLGLSTSHGSSIFESAGQERRQYAPPPQPAMSATALLQKAAQMGAAATNASLLRGFGIMSSSTSSTQQESMQWNQRPAEPDNVSVAAGLGLGLPCDGGS…
MdIDD18	MDP0000233283	MNKGLMVDENMSNLTCASGDLSASNSSIRNESSSAGTVYPHPASSAQIQQQQAPPPPKKKRNLPGNPDPDAEVIALSPKSLMATNRFVCEICNKGFQREQNLQLHRRGHNLPWKLKQRTGKEVRKKVYLCPEPTCVHHEPSRALGDLTGIKKHFSRKHGEKKWKCEKCSKRYAVQSDWKAHSKVCGTREYRCDCGTLFSRRDSFITHRAFCDALAQENNTSSAAARSVMPASINPLLSSLPQLHSHGLQVQSAVKREQDQHQQQLLPPWLSFLPEGGEAASLPTMNLSASPLFSTSSFQQYYSFDQNPNPSSSSTALLPDNFQLQQNTASPHMSATALLQKASEMGATISKTSPSPYFKPPTHQSYLAHQAHMSNETSRDQAILLDDGFGNNESKSSLF…
MdIDD19	MDP0000441454	MLPPQQAQPHHLKRKGEINQEIQATDPDAEVIALSPKTLMATNRFICEVCNKGFQREQNLQLHRRGHNLPWKLKQKTNKEPRRKVYLCPEPSCVHHDPSRALGDLTGKKHYSRKHGEKKWKCDKCSKRYAVQSDWKAHSKTCGTREYRCDCGTLFSRRDSFITHRAFCDALAQESARHPSSLSTMGGSLYGNNHMSLGPSQIPSLQNSTHLPNNLRLGSSGSAKFEHLIPPSNPSSFGSQAMPNSPNFFMRDIANQQGFQDQHQFPNKVLHGLMQLPDLQSNPNNNSSSPSSNSAANLFNLSFFSNNGTSRSITPTDHQFSDGNGGGQGFSMSHDHQIGSGSLPSLYGNSMQHEGGMAPHMSATALLQKAAQMGSTTSTESSSLLRGLGNSSTRAAKSG…
MdIDD20	MDP0000126615	MHARCQEENQLHVTETGPSRRCSLHVSDQRPRERERELSNDNISLLAYAGFQQHSPVSNYLHQRTSQIAQGGLLKGQKEKKKKKIDQKEMAASSSSGAPLFGIREEDQNQQMNKQQHSSTTPTSSTAAPAAPTQKKKRNQPGTPSKYEFSNLLWFGIFHERTDPEAEVIALSPKTLMATNRFICEVCNKGFQREQNLQLHRRGHNLPWKLKQKTTKEPKRKVYLCPEPTCVHHDPSRALGDLTGIKKHYSRKHGEKKWKCEKCSKRYAVQSDWKAHSKTCGTREYRCDCGTLFSRRDSFITHRAFCDALAQESARHPPSLSTIGSSLYGGGSLSNTGLGLSQQVVGPPHQLSSLDHNNQSSLLRLGGSSGADAAARTGQFDHLLSSPSMGSSFRSAQSS…
AtIDD1	At5g66730	MPVDLDNSSTVSGDASVSSTGNQNLTPKSVGKKKRNLPGMPDPDAEVIALSPKTLMATNRFVCEICNKGFQRDQNLQLHRRGHNLPWKLRQRSTKEVRKKVYVCPVSGCVHHDPSRALGDLTGIKKHFCRKHGEKKWKCEKCSKKYAVQSDWKAHSKICGTKEYKCDCGTLFSRRDSFITHRAFCDALAEESAKNHTQSKKLYPETVTRKNPEIEQKSPAAVESSPSLPPSSPPSVAIAPAPAISVETESVKIISSSVLPIQNSPESQENNNHPEVIIEEASRTIGFNVSSSDLSNDHSNNNGGYAGLFVSSTASPSLYASSTASPSLFAPSSSMEPISLCLSTNPSLFGPTIRDPPHFLTPLPPQPAMSATALLQKAAQMGSTGSGGSLLRGLGIVST…
AtIDD3	At1g03840	MTTEDQTISSSGGYVQSSSTTDHVDHHHHDQHESLNPPLVKKKRNLPGNPDPEAEVIALSPKTLMATNRFLCEICGKGFQRDQNLQLHRRGHNLPWKLKQRTSKEVRKRVYVCPEKSCVHHHPTRALGDLTGIKKHFCRKHGEKKWKCEKCAKRYAVQSDWKAHSKTCGTREYRCDCGTIFSRRDSFITHRAFCDALAEETARLNAASHLKSFAATAGSNLNYHYLMGTLIPSPSLPQPPSFPFGPPQPQHHHHHQFPITTNNFDHQDVMKPASTLSLWSGGNINHHQQVTIEDRMAPQPHSPQEDYNWVFGNANNHGELITTSDSLITHDNNINIVQSKENANGATSLSVPSLFSSVDQITQDANAASVAVANMSATALLQKAAQMGATSSTSPTTTI…
AtIDD8	At5g44160	MTSEVLQTISSGSGFAQPQSSSTLDHDESLINPPLVKKKRNLPGNPDPEAEVIALSPTTLMATNRFLCEVCGKGFQRDQNLQLHRRGHNLPWKLKQRTSKEVRKRVYVCPEKTCVHHHSSRALGDLTGIKKHFCRKHGEKKWTCEKCAKRYAVQSDWKAHSKTCGTREYRCDCGTIFSRRDSFITHRAFCDALAEETAKINAVSHLNGLAAAGAPGSVNLNYQYLMGTFIPPLQPFVPQPQTNPNHHHQHFQPPTSSSLSLWMGQDIAPPQPQPDYDWVFGNAKAASACIDNNNTHDEQITQNANASLTTTTTLSAPSLFSSDQPQNANANSNVNMSATALLQKAAEIGATSTTTAATNDPSTFLQSFPLKSTDQTTSYDSGEKFFALFGSNNNIGLMS…
AtIDD10	At5g03150	MQMIPGDPFSISSSMGGFVHQETHLHHLQQQIPDLNPNSNPNPNAKPNSSSAKKKRNQPGTPDPDADVIALSPTTLMATNRFVCEICNKGFQRDQNLQLHRRGHNLPWKLKQRSKQEVIKKKVYICPIKTCVHHDASRALGDLTGIKKHYSRKHGEKKWKCEKCSKKYAVQSDWKAHAKTCGTREYKCDCGTLFSRKDSFITHRAFCDALTEEGARMSSLSNNNPVISTTNLNFGNESNVMNNPNLPHGFVHRGVHHPDINAAISQFGLGFGHDLSAMHAQGLSEMVQMASTGNHHLFPSSSSSLPDFSGHHQFQIPMTSTNPSLTLSSSSTSQQTSASLQHQTLKDSSFSPLFSSSSENKQNKPLSPMSATALLQKAAQMGSTRSNSSTAPSFFAGPT…
AtIDD15	At2g01940	MRTDQVMLSNKNTNTCCVVSSSSSDPFLSSSENGVTTTNTSTQKRKRRPAGTPDPDAEVVSLSPRTLLESDRYICEICNQGFQRDQNLQMHRRRHKVPWKLLKRDNNIEVKKRVYVCPEPTCLHHNPCHALGDLVGIKKHFRRKHSNHKQWVCERCSKGYAVQSDYKAHLKTCGTRGHSCDCGFFSSFRVESFIEHQDNCSARRVHREPPRPPQTAVTVPACSSRTASTVSTPSSETNYGGTVAVTTPQPLEGRPIHQRISSSILTNSSNNLNLELQLLPLSSNQNPNQENQQQKVKEPSHHHNHNHDTTNLNLSIAPSSSYQHYNNFDRIKEIMASEQIMKIAMKEKAYAEEAKREAKRQREIAENEFANAKKIRQKAQAELERAKFLKEQSMKKISS…
OsIDD2	Os01g09850	MMLKDLAEIQQQQLLAAAEENMSNLTSASGDQASVSSHPAPPPAKKKRSLPGNPDPEAEVIALSPRTLMATNRYVCEICGKGFQRDQNLQLHRRGHNLPWKLKQRNPKEVVRKKVYVCPEAGCVHHDPARALGDLTGIKKHFSRKHGEKKWKCDKCSKRYAVHSDWKAHSKVCGTREYRCDCGTLFSRRDSFITHRAFCDALAEESARAVTAAAAVAGQQQHGGGMLFSQVADVLDHQAAMAMGGHGLMQELCLKREQQQQQQQFAPSWLTAQQQQQQLEAMAGAGNPAAMYGSARLDQEFIGSSTPESGGAQQAGLSFGFSSTSSAPPHPAASSAHMSATALLQKAAQMGATLSRPSSHAHMAAAAAASTHNSSSSAATTNAPPPPPTSNVSSTCVGA…
OsIDD10	Os04g47860	MASNSSAAAAAAFFGISRDGDQHDQIKPLISHQQHQHQQQQLAASLTGVATAAPTAASSQGAPPAAPPAKKKRNLPADPDAEVIALSPKTLLATNRFVCEVCNKGFQREQNLQLHRRGHNLPWKLKQKNPAQAQRRRVYLCPEPTCVHHDPARALGDLTGIKKHFCRKHGEKKWKCDKCSKRYAVQSDWKAHSKICGTREYRCDCGTLFSRRDSFITHRAFCDALAQESSRLPPTSLSSLTSHLYGASNAGNMALSLSQVGSHLTTSLQDGGGHHHHPSPELLRLGGAGGGGGAGGGSSIAARLDHLLSPSGASAFRPPQPAFFLNAAAAAAATGQDFGDDAGNGQHSFLQAKPFHGLMQLPDLQGNGAGGPGAPGPNLFNLGFFANNGNSSGSSHEHA…
OsIDD14	Os03g13400	MALVKSHHQMLASSSTSSSSPSSQQQQPPPPASNSSSLAAAAADQPSPAKRKRRPPGTPDPDAEVVALSPRTLLESDRYVCEICGQGFQREQNLQMHRRRHKVPWRLVKRPAAATAAEDGGAAGGGGGAGGGAGGGGARKRVFVCPEPSCLHHDPAHALGDLVGIKKHFRRKHGGRRQWVCARCAKGYAVQSDYKAHLKTCGTRGHSCDCGRVFSRVESFIEHQDACNSGRVRGEVVPVATTLPVIRPAALRHHHHHPPPPPPELQLLPASTTAPLAAAFSSNSTTTGSSSHEQHATTMTTTKLQSIGPAAVVAAASGGGGACAAAAGGEEEQQREEVRRALEEKTAADAARERAREEAAAAERALEDARRARHRARGELEKALALRDHAARLIAQVTC…
ZmID1	AF058757	MQMMMLSDLSSDDHEATGSSSYGGDMASYALSPLFLAPAASATAPLPPPPQPPAEELTNKQAAGGGKRKRSQPGNPDPGAEVIALSPRTLVATNRFVCEICNKGFQRDQNLQLHRRGHNLPWKLRQRSSLVVPSSSAAAGSGGRQQQQQGEAAPTPPRKRVYVCPEPTCVHHDPARALGDLTGIKKHFSRKHGEKRWCCERCGKRYAVQSDWKAHVKGCGTREYRCDCGILFSRKDSLLTHRAFCDALAEESARLLAAAANNGSTITTTSSSNNNDLLNASNNITPLFLPFASSPPPVVVAAAQNPNNTLFFLHQELSPFLQPRVTMQQQPSPYLDLHMHVDASIVTTTGGLADGTPVSFGLALDGSVATVGHRRLTRDFLGVDGGGRQVEELQLPLCA…
