# Supplementary material for: Comparative genomic analysis of the IDD genes in five Rosaceae species and expression analysis in Chinese white pear (Pyrus bretschneideri)
Source: PeerJ. 2019 Mar 26;7:e6628. doi: 10.7717/peerj.6628 (PMC6440465; doi:10.7717/peerj.6628)
Supplement: Supplemental Information 17 [file peerj-07-6628-s017.xlsx]

## Sheet: Table S1
Supplementary Table S6. Promoter sequence of 16 IDD genes in pear
Gene name	Promoter sequences
PbIDD1	TCATGAGCTTCTAGCCAAGTCCTTACCGCTATATTCTCCACCTCCATAGGATGCAGCTGCGGCTGCTACATCTAGACCGCCACCGATTGATGTAATTAGGGCCGATAGGCCGCTACTGGGGTTATTACCGGCGGCCATTCCCAATCCCAAAAGATCAAGTGTGGTTTGCTTGGGACCGAACATTGAAGGACTTTCCATCATTAATTCCTTCCATCCCGAACCTCCATCACAAGGGAGACCAAGTCCAAGCCCTGCAGCAACTGGGGCATTATCTGGTTCTGCCGGCCTTTGATTCCATTGCATGGTCTCTTGTTGCACGGAAGATGATGCGGATGACATAATGCCAAACCCACGAAGTAACGATGCATTGGTTTCTGCTGGGCCCATTTGAGCAGCTTT…
PbIDD2	CTAAATGTTGGGCTTTCTATCTTGTGCACCTTCCCACGATTCTCCCTGCGAGCTTCCACCGCCCGCTCCTCCACTTCCGTACGGAGCTGCAACATTGAAGGCACCGCCGCTGCCGCCAAAGGAATTCAGGAAAGCAGAAAATCCGCCTGTGGAAGCGCCACCGCCACCACCACTACCGATGCTCAGCCCAAGAAGGTCACGAGTCATGGGCTGGCCCCCGAACGACGAAGGTGGACCCATCATTAGATCATTCAATTGGGTAACATTTGCAGTTGAGAGAAGTTGAAGCCCTAACTCGGCTCCCACGTGAGCACCACCACCACTCTCTGGCTTCTTGTTCCACTGCAATGTGGTGCTACTTTCTTGAGACGGGGATGAGGTCGTGGACAACCCGAACCC…
PbIDD3	TTAACCTTGCCAAGGTTTTTGGTGGTCACGGGAAGCAGTATTAGCAACAGCGGCAGCAGCATTAGCACTTCTGACACAGTTTCCAATACCAGCAATGTTCAGAATGTCACTGTGAGACAGTGCTCTCAGTCCCAAGAAATCTCGGGTCAAACCTTCACCGTTTGCACCGCCGTCGTCGCTACCACTTCTGTTGAAATGGGTCGAATTGGTCGAGTCTTTTTTTGCATTGTTCAAAATATTAGGGAGGGAGCCGAAAGCCTCCAGCTCAAAAGCAGCCCCTTCGAACCCAGTTCCGGAAGACAGAGAGTTCATCATATCATGGAGCAGAGACGCTTGATGATGTTGGTTTTGATGGTGATGATGAACACCTGAGACTGCAGGACCAGTTGTGCTATTAGT…
PbIDD4	ATCTCTTTTTGTAGCTTAGTCGTTCACAAAAGATCAAAAATAGACTAGTTTTGGAAAGGCTCTAATTAAGGAGGCTAAAAGAAGAACAAAAAAAACAAGTATTTTGTGTTTAGACACACTCCAATCGATTCTGCCAAAACCCAAGTCAGGTTGTTTTTTTAGTAGCACTGTAAATTACAAAAACCCTCACAAAAATATAGGACGCTAGAGGTTGATGATGATCTGGTTTTTGCCTCTGTCTGTTTGATTTCCTAAGAGAAAAAACCAAACACCATGATGCCTAAAAGAGAATATATCATCTTTTATATTTTCCTGGCTAAGCTCTGTCTCTCTTTCTCTATTTTTCTTCTATGCAGTCATAGTCTTACGCGTATAAGTCTCCTTTATCCTCAAAGTCCG…
PbIDD5	TTAACCTTGCCAAGGTTTTTGGTAGTCACGGGAAGCAGTAGTAGCAGGAGCATTAGCAGTATTGACGCAGTTTCCAAGACCAGCAATATTCAGAATGTCACTGTGAGACAGTGATCTCAGTCCCAAGAAATCTCGGGTCAAACCTTCACCGTTTCCACCGCCGTTTGCACCCCCTTCGTCACTGCCGCTAACGTTGAAATGGGTCAAATTGTTCGAGTCTTTTTTCGCATTGTTGTTCAACATGTTGGGGATGGACCCGAAAGGCTCCAGCTCAAAAGCAGCCCCTTCGAACCCAGTTCCGGATGACAAGGAGTTCATCATATCATGGAGCAGAGAAGCTTGTTGATGTTGATTTTGATGGTGATGATGAACACTTGAGACAGCAGGACCAGTTGTGCC…
PbIDD6	ACGTACGAGTTATCTAGCTAGCCATCTACATGTATATTACTGAGCTGCGCGCGCGCACACACAAAATAAACTATTAAACGATGGTGGGTTGTGTTGTGCAAGCACTTGGGACCGGCCAACATATACCCCTTCTTAATTTGTTGCCCTATTCATTTTGCAGGCCAAGAAAATGTCAGAATAAAACTAGCTAGCAATAAGCTATAAATAATATTTTAATATTGGAATTGGATTACTAAAATAATAATAGGTTAGGGGGATAGTATAAGAATGAGGACTGTTTTCCCACAAGCATGTCTCTGCTCGAATGAATATCCAATCATCCTAATATATTTAAATGATGTGGTTGCAGATGCACAAATCAAAGTTATAAAGGTTTTGCATTATTTTTCCTTTCTCTTT…
PbIDD7	TCATTGTAGTGTAGTGCCTCCAAAGGGTTGACTTGCCTGTGCTGACTCCAACTCTGGGTCCAAAGAGCTGATCATATTGATGCCATGATGTTGTTGTTGTAGATTATCTCTCTGTGAGTATCCATGGCCACCACTCATATTTCTTACCATCCCTCCAACACCAAGAAAATCCAAGGTCAATTTATCAGATCCTCCAAAATTCACACCCAAGTTTTGGTGCATCTTGGCCTCATCATAATTAGGGTTATTATGCTGTTGGTCCATTGCACTAACCCTATTAGCAGTACTGCCGCTACTAAACCCGCCAAAGTTGTTATTATGATCCTGTTCCCCACCTCCGAAAATCGAAGAGTTGCCATTTGCAAGAGAGTTCATTAGTCCTTGAAGATGGTTTTCATT…
PbIDD8	TAGACCCAATTGTTAAACTATTAGGTTAATTAGACATAAATGGGACCCCTCGATTTCCCAAAAATAACCAAATTGCCTAATTAGGGCTCTTGAACTCTTTTTTAATTTTTTTTTTCCTGATAAATGACAACGAGTTACTATTCTGTAATCTAATTTAGTGAATTAGGTAGATATAATGATATGTATTGCTCCTCGGTGTAAAGTATGTTCTATGCAAGAGGTTTCCAGTTGATTAGATCATTCAATCTTGCACTCAGGTCTCAAATTCGACTTTCTTACAATATTGTTTGTAAAAAAATAAAAAAAAACTTCTAGTCTTGTAAGTTTTATGGGGCTTGCCTTTGGAAAGTATCGTTCAACCCTTAGATTTGGGTTCCTAGTGGTGGTGGGCTACGGCGG…
PbIDD9	NNNNNNNNNNNNNNTTTCCCTAAATAGCTATAGCCTTTTCCCTCTACTTTGTGTGTGTGTGTGTGTGTTTTTTTTTTTTAAATTAAACACTTAAAATTAACACATTTGCTTATCAGACATCAATATACAATTGAATTTTACCATCTATATATATGAAGGGAAAAGACAAAAAGGGTAAAACTTTTATAATACTCAAATTATCCTTCTTCCATTAATTTTTGAAAAACTAAATAAACTTAAATGAGAAAACATTAAAAGAAATTGGTGAAACATAAGAATGATTGTACCCATATATATATATATATATATATATATATATATATATTAAATTGACTTGTTTATACCGAAAAGTATGTACCTAAATGTTTGTACCGAAATATATTATAATGAATTAGTGTA…
PbIDD10	TCAACAGTCTCCCCACGTTTCCGAAGCAGTAGTAGTCTCAGCGAACCCGAAACCCTGGGGCTTCAGCAGCGAATCATGGCCACGAAGACGCTCGTACGGCGGCTGATGGAACCCTACGCCACCGGCGTACGTTAGCATGTCCTTGACGTGAACACCGCGAACGTTATTATTATCATGCCCCGTGCCATCCCCGTTCAGACCTAGAAAGTCTCTTGTCAGACTGTCAGTCTTGCGCCATGTCGCGAGCTCTCCGGACCCGAACCCGCCTAGATACTCTGTGGATATCATGTGGCTCGCGGTCCCAAACTCTCCCACGGTCAAGCCCGCTGACTGTCCCTGTTGGGCTCCAGAGGCTACTGCTGCACCAACGGTTGCAGCCTTCTGGAGGAGTGCAGTAGC…
PbIDD11	AGTGCAGCATGCATGCATCGATCATGCATCACAATCCTCAGCTTTCTGAGTCCCCTCTTTTTCCCACAGAGAAAACTCATCGAGAGAGACAGAGGTATCACGGACGGTCCTTTCAAACGCCTCGGGAACTACATGCATATTCACGCACAAATTTACACACTCATGTCTGATACATCTCTGCTTAAGTATTAATTTATTTGAGTCCAACTTTAATTATGGCAATAATCATTTTAAGCCGATCAAATTCGACAGGCTGGTAAAAAGGCAAGTAACTTTCTGAGAATTACCTTTTTGATTCGATCGCTAGCTTCAAAAACCTTTCACCTTTTAACTAATTATATATTTGTAAACATAATTGGGGTTTGAGCTCAGAAAACAACAAAATGCACACTACCCTAC…
PbIDD12	CCAATCACTTATCAAATTCTACAAATAAAGCAAAATTTGCACTCTATTAGTATTACATATATATCAACCTTGAAAATCAGAGAAGTGACTCAAATCAAATCACTTTAATTTAATAATTACCTCATAATTTTTTTACTGTTATTTAATTACAGCTAGGCCTTGGGAAATGATAGGGTTGTTGATGATGATAGCAATTATACTTAGTGGTGGTGTAAATGTTTATTTATCTAAATAAACTAATTTTCCCAGGTAATTGTGTTTCGATATATAGTAGTTGGATTAGGTCTTTTCTTAATTGATCTTAGTCTTTTAGGTATGATTTTCGGATGTAATTATAAAGGGACTAAAACAACCTTTCATGGCTTCCCATAATATGTCTGCCCGTAGGAGGAGAATCAA…
PbIDD13	TCATTGATGCCGACTACTGGTAGTAGTACTAGTGTATTGGCTCAAGTCACTCATAGAAGCTAACTTTGCTAGCTCTTGTTGAAAGAAAGGCACTCCGCCACCAAATATTGCATCACCTCCTCCCACTCCAAGAAAGTCTCTAGTTAAACTGCTTTGCTCACTTGTTCCTTGTCTTGTCATGGCTGCTGCTCCAGCTGGCATCATCAAGTGTTTGTTGCTCAAGAACAGTGACCCATCTTCAATTGTGGCTCCTTGAGTTGACGAGGAAGACATAGAATTCACCAAATCATTGAAGTTCAAGGTGGTGTCGTTGAATGTTGTAGCTGGGTTGTTGTTGTTGCTGGTTGTAGATCCCATTCGAGCTGCTTTTTGCAGAAGTGCTGTGGCTGACATGGGTTG…
PbIDD14	TGAAAGACGATGTAATGGTTATGTAAGTCCTGGAAGAGTCTGATGAGTAGATTTTATATTATATATTTAACCATATTTTTAGTATATTTTGATTAATATTTTAGAGAATGTGGGAGTGAGAAGTTTTTTTTTTATTTTTTTTATTTCCTTTTAATTAGAGGTATGTTAGGATTATATGTAGGTGAGGTTTTGAAGAAAAAAAACAGTAAAATTTGGTTGTGTGAAATTACATTTCTGCCTCATATTTCTTATTCATATTATGTTTTAATTAGAAAGTTAATCTAGTAATTTGATAAAATTTTAGTTGACAATAAGTGTTTTATTAATTAGTAGAGATAAGATAGATGTTATTCGGTTAAGTAAATCAGTCAAAATGTACAACCATCCGTTTATAATTAA…
PbIDD15	TTAGGCGCTAGCAGATTTTGCACGATGGGTTCGAGTACTGATATCCTTCTCTAATCGATGATCATCTGACGTTATAGCCGATGACATGTAACTCAAAACCAGGGAATGTTGATTGGTTGTTGCTTCATGCGCACCTTGCATAAACTGTTTCTTGCAGGCATGGCAAGTGATTTGGAGAATGGTAGAGTTCACTTTCTTGACCGCTTGCTCTTTCAAAGCGTGAGCCTTGTCTAACTCGGCCTGCGCTTGTTGCCTTATTCTCTTGGCATTTGCAAACTCCTTCTCCGCCAGTTTGATGTGGCTCTCCGCTTGCTGCCTCGCCTCTTCAGAATAATCTTTTTCCGCCATCGCAAGCCTTAACTGCTCTCGCGCTTCTTCTTTCAGCCTCAATATCCCAGC…
PbIDD16	TTAGTTCAATGCCAAATGATAATACATGTTAGAATAATTGTTGGTCGGGAAGCTAGGTTTCTGAAAAGATGTTAGAATAATTGTCAATTACCGTAATCGATTACTACTTTACTGGACACCCAATTTGAAAGATCGAGAAGTTTGAGATGTGCATGCAAAGAGCGGCAAATATTTTTGTTTTTGAACTAATTACTATTTATTAACAAAAAAAGAGACTAATTATTATTTACAATTAACATAAAATGGAAATTAAACAGAAGTTAGAGAAATGATTACGGCAGGCCTCTTGAAAATGACTAATCTCTAATCGTGCTACTACTTTTTACCTTTCCAAAAGCCGCTTCAAGAAACATGTTAATCCGGATTAGCTCAGGCATCATTTCGTTAAAATCAAACCGT…
